1 **A systematic review and meta-analysis on the safety and efficacy**  
2 **of tocilizumab in the management of COVID-19**

3  
4 Gollapalle L Viswanatha<sup>1\*</sup>, CH K V L S N Anjana Male<sup>2</sup>, Hanumanthappa Shylaja<sup>3</sup>

5  
6 <sup>1</sup>Independent Researcher and Consultant, Kengeri, Bangalore -560060, Karnataka

7 <sup>2</sup>Department of Pharmaceutical Chemistry and Phytochemistry, Nirmala College of  
8 Pharmacy, Mangalagiri -522503, Andhra Pradesh

9 <sup>3</sup>Independent Researcher, Kengeri, Bangalore -560060, Karnataka

10  
11  
12  
13  
14  
15  
16 **\*Corresponding Author**

17 **Dr.G.L.Viswanatha**

18 No.387/511/A, Megalabeedi, Kengeri

19 Bangalore-560 060

20 Karnataka, India

21 Email: [glv\\_000@yahoo.com](mailto:glv_000@yahoo.com)

22 Mob: +91-9844492334

23 Phone no.: +91-80-28482862

24 Fax:+91-80-28482862

25

1 **A systematic review and meta-analysis on the safety and efficacy of tocilizumab in the**  
2 **management of COVID-19**

3

4 **Abstract**

5 **Background:** This systematic review and meta-analysis was aimed to evaluate the  
6 therapeutic benefits and safety of tocilizumab (TCZ) in treating severe coronavirus disease  
7 2019 (COVID-19) and associated health complications.

8 **Methods:** The electronic search was performed using PubMed, Scopus, CENTRAL  
9 (Cochrane Central Register of Controlled Trials (RCTs), and Google scholar databases to  
10 identify the retrospective observational reports. The studies published from 01 January 2020  
11 to 30th September 2020 involving comparison of TCZ group with SOC/control treatment  
12 group were included. The studies included in this work involve RT-PCR confirmed cases of  
13 COVID-19 (Population), having tocilizumab and corresponding SOC/control as interventions  
14 (Intervention), comparison between tocilizumab versus SOC/control (Comparison) for the  
15 parameter of interest. Mortality, incidences of ICU admission, need of mechanical ventilation  
16 (MV), length of stay in the hospital (LOS), and length of stay in the ICU (LOS-ICU), and the  
17 incidences of super-infection, bacteraemia, fugleman, pneumonia, and pulmonary thrombosis  
18 were evaluated as the primary outcomes. The comparison will be between TCZ versus  
19 standard of care (SOC)/placebo.

20 **Results:** Based on the inclusion criteria there were 24 retrospective studies involving 5686  
21 subjects were included. The outcomes of the meta-analysis have revealed that the TCZ has  
22 reduced the mortality (Mantel-Haenszel (M-H), random effects risk difference (RE-RD) of -  
23 0.11 (-0.18 to -0.04), at 95% CI,  $p = 0.001$ ,  $I^2 = 88\%$ ) and increased the incidences of super-  
24 infections (M-H, RE-Risk ratio (RR) of 1.49 (1.13 to 1.96) at 95% CI,  $p=0.004$ ,  $I^2 = 47\%$ ).  
25 However, there is no significant difference in ICU admissions rate (M-H, RE-RD of -0.06 (-  
26 0.23 to 0.12) at 95% CI,  $p=0.54$ ,  $I^2 = 93\%$ ), need of MV (M-H, RE-RD of 0.00 (-0.06 to 0.07)

1 at 95% CI,  $p=0.96$ ,  $I^2 = 74\%$ ), LOS (Inverse variance (IV): -2.86 (-0.91 to 3.38) at 95% CI,  
2  $p=0.37$ ,  $I^2 = 100\%$ ), LOS-ICU (IV: -3.93 (-12.35 to 4.48) at 95% CI,  $p=0.36$ ,  $I^2 = 100\%$ ), and  
3 incidences of pulmonary thrombosis (M-H, fixed effect odds ratio (FE-OR) of 1.01 (0.45 to  
4 2.26) at 95% CI,  $p=0.99$ ,  $I^2 = 0\%$ ) compared to SOC/control.

5 **Conclusion:** This meta-analysis was performed using retrospective clinical reports on the use  
6 of tocilizumab in COVID-19 and based on the outcomes of the meta-analysis we can  
7 conclude that administration of TCZ would reduce the risk of mortality, and however there is  
8 no much difference observed between the TCZ and SOC/control groups in other parameters  
9 such as ICU admission rate, need of mechanical ventilation and length of hospital stay (ICU  
10 and Non-ICU). On the other hand, TCZ treated subjects possess higher chances of super-  
11 infections and pneumonia compared with SOC/control group. However, there is a need for  
12 multi-centric randomized trials to determine the potential therapeutic role of TCZ in  
13 mitigating COVID-19 and associated health complications.

14 **Keywords:** *COVID 19; tocilizumab, cytokine storm, interleukin-6, retrospective studies.*

## 15 **1. Introduction**

16 Coronavirus diseases (COVID-19) is a viral disease caused by severe acute respiratory  
17 syndrome corona virus-2(SARS-CoV-2) that originated from Wuhan city of Hubei province  
18 in China in December 2019[1]. Globally it has caused a significant burden on public health  
19 through a drastic increase in the morbidity and mortality rate[2]. The available evidence  
20 suggests that most of the infected patients will remain asymptomatic or develop mild  
21 symptoms, however nearly 20% of the infected individuals would develop severe pneumonia  
22 and respiratory distress syndrome (ARDS) that further progress to cytokine storm syndrome  
23 and induced end-organ failure[3]. Interestingly, the United States Food and Drug  
24 Administration (USFDA) has approved the drugs such as Remdesivir [4], Bamlanivimab [5],  
25 and dexamethasone[6] for the treatment of hospitalized patients with COVID-19. Further, the

1 drugs such as decitabine [7], duvelisib [8], and infliximab [9] are currently under clinical  
2 development phase for the treatment of COVID-19. In this context, it is well-known that  
3 interleukin-6 (IL-6) is a pleiotropic cytokine that plays a pivotal role in immune-regulation,  
4 inflammation, and infection [10, 11]. Noteworthy, the elevated levels of IL-6 in the blood is  
5 highly correlated with the mortality rate in the COVID-19 infected patients [12]. The  
6 activation of the IL-6 amplifier would induce cytokine storm, a hallmark of dysregulated  
7 inflammation, and thus inhibition or blockade of IL-6 amplifier would alleviate cytokine  
8 storm in COVID-19 [12]. In these lines many studies have reported that TCZ administration  
9 could stabilize the health status of COVID-19 patients by improving respiratory functions,  
10 reducing CRP levels, and improved health deteriorations due to COVID-19 [12]. Besides,  
11 there are multiple case study series, retrospective and prospective study reports available on  
12 the therapeutic benefits of TCZ in COVID-19. Though there are few randomized controlled  
13 trials (RCTs) reported on the use of TCZ in COVID-19, the low number of subject  
14 enrollments In those studies are considered as major limitations and authors have highlighted  
15 the need of multicentric RCTs involving a higher number of subjects to determine the safety  
16 and efficacy of tocilizumab in COVID-19. In this context, there are several randomized  
17 controlled trials registered and under progress to evaluate the clinical benefits of TCZ in  
18 alleviating COVID-19 and associated health problems (phase II; NCT04317092,  
19 NCT04445272, NCT04377659, phase III; NCT04320615, NCT04330638, NCT04345445)  
20 [13].

21 With this background, the present study was undertaken to evaluate the clinical benefits of  
22 TCZ when administered alone and in combination with standard of care (SOC) and/or  
23 placebo in reducing the COVID-19-induced mortality, ICU admissions, MV, LOS, LOS-  
24 ICU, super-infections, and pulmonary thrombosis.

## 25 **2. Methodology**

1 A detailed literature search was performed using electronic databases such as PubMed,  
2 Science direct, CENTRAL (Cochrane Central Register of Controlled Trials (RCTs), and  
3 google scholar to identify the clinical reports (retrospective). The keywords such as  
4 'Coronavirus disease 2019' OR 'Coronavirus infection' OR 'Coronavirus' OR 'SARS COV-2'  
5 OR 'nCOV 2019' 'Severe acute respiratory syndrome COV 2' AND 'Tocilizumab' OR  
6 'Interleukin-6 inhibitors' OR 'Cytokine storm' and 'COVID-19 treatment' were used. Grey  
7 (unpublished) literature was searched in the following trial registries: US National Institutes  
8 of Health (NIH; <https://clinicaltrials.gov/>) and the WHO International Clinical Trials  
9 Registry Platform (ICTRP; <https://apps.who.int/trialsearch/>). Further, the pre-print servers  
10 such as Research Square, bioRxiv.org, and medRxiv were also considered while searching  
11 the grey literature. Besides, authors have approached the domain experts, seeking their  
12 suggestions and inputs in identifying the additional studies (if any) relevant to the topic. The  
13 search was not restricted to any publication language or status of the trial. Furthermore, the  
14 reference lists of all relevant articles were hand-searched to find additional studies. An  
15 example of a search strategy using PUBMED has been highlighted in **Annexure 1**.

## 16 **2.1. Inclusion criteria**

17 The studies published from 01 January 2020 to 30<sup>th</sup> September 2020 involving comparison  
18 of TCZ group with SOC/control treatment group were included. The studies included in this  
19 work involves RT-PCR confirmed cases of COVID-19 (Population), having tocilizumab and  
20 corresponding SOC/control as interventions (Intervention), comparison between tocilizumab  
21 versus SOC/control (Comparison) for the parameter of interest, the evaluations such as  
22 Mortality, ICU admissions, MV, LOS, LOS-ICU, super-infections and pulmonary thrombosis  
23 (Outcomes) were included in the study.

## 24 **2.2. Exclusion criteria**

25 1. Studies reporting incomplete data.

- 1 2. Single-arm studies.
- 2 3. Duplicates, case reports, case series were excluded.
- 3 4. *In-vitro* and pre-clinical studies
- 4 5. Studies reporting qualitative outcomes without numerical data

### 5 **2.3 Quality assessment and Risk of Bias analysis for included studies**

6 All the included studies were subjected to the quality assessment using the Newcastle-Ottawa  
7 scale and also evaluated for risk of bias using the Cochrane Collaboration tool to assess The  
8 Risk of Bias in Non-randomized Studies of Interventions (ROBINS-I).

### 9 **2.4. Parameters**

10 The parameters related to COVID-19 such as Mortality, ICU (intensive care unit) ward  
11 admission rate, the need of mechanical ventilation, length of hospital stay (LOS), length of  
12 hospital stay in the ICU (LOS-ICU), and the incidences events such as super-infections,  
13 fungemia, bacteremia, pneumonia, and pulmonary thrombosis were evaluated as the primary  
14 outcomes. The comparison will be between TCZ and standard care/placebo/control.

### 15 **2.5. Data collection, extraction, and Analysis**

16 Data collected was analyzed separately by two reviewers based on the inclusion and  
17 exclusion criteria listed above. The analysis was carried out at three levels namely on title,  
18 abstract and full-text level. Any disagreement was resolved by discussing it with the third  
19 reviewer. Data such as details of participants, methods, interventions, frequency/duration of  
20 treatment, outcome measurements, and adverse effects were extracted from the included  
21 studies. For studies that reported results only in graphical form, numerical values from the  
22 graphs were extracted using Adobe® Reader® XI inbuilt measuring tool, version 11.0.06,  
23 (Adobe Systems Incorporated, San Jose [California]).

### 24 **2.6. Statistical analysis**

1 Review Manager (RevMan, version 5.3; Nordic Cochrane Centre [Cochrane Collaboration],  
2 Copenhagen, Denmark; 2014) shall be used to analyze the data. For continuous, variables,  
3 inverse variance (IV) was estimated using the random-effects model with a mean difference  
4 (MD) or standardized mean difference (SMD) as an effect measure and for the dichotomous  
5 variables, the Mantel-Haenszel (M-H) statistic was estimated using a random-effects model  
6 with an odds ratio (OR) or fixed-effects model with a risk ratio (RR) as the effect measure. A  
7 random or fixed-effects model shall be used to calculate the pooled prevalence with a 95%  
8 confidence interval (CI). Heterogeneity shall be calculated with the  $I^2$  statistic. This test  
9 estimates the percentage of variation between study results that is due to heterogeneity rather  
10 than sampling error.  $I^2$  of less than 40% is considered unimportant while that of more than  
11 40% is viewed as moderate to considerable heterogeneity.

### 12 **3. Results**

13 A total of 1425 articles were identified based on the online search, of which 24 articles  
14 involving 5676 participants were selected for systematic review and meta-analysis (List of  
15 excluded studies based on the full-text screening are given in **Annexure 2**). The PRISMA  
16 flow chart of the studies selected is given in **Figure 1**. Only Retrospective studies were  
17 selected for the analysis; the characteristics of the included studies are summarized in  
18 **Table 1**. In all the included studies TCZ was common and the effect of TCZ was compared  
19 with the control group; while in few studies, both standard treatment and TCZ groups had  
20 background/previously received either antibiotics, antiviral drugs and corticosteroids, and  
21 oxygen which are considered as the standard of care (SOC), and in these studies, the  
22 comparison was made between TCZ + SOC versus SOC alone, here the SOC alone is  
23 considered as placebo. In the studies where multiple doses of TCZ was used, the response for  
24 mid-dose was considered for analysis. In this study, the parameters such as mortality, ICU  
25 ward admission rate, need of mechanical ventilation (MV), Length of Hospital Stay (LOS),

1 Length of Hospital Stay in ICU (LOS-ICU) and incidences of events such as super-infections,  
2 fungemia, bacteremia, pneumonia, and pulmonary thrombosis were compared between TCZ  
3 treatment versus control/SOC groups in COVID-19 positive patients.

### 4 **3.1. Quality assessment and Risk of Bias (RoB):**

5 All the included studies have passed the quality assessment and showed a low risk of bias.  
6 The quality assessment and Risk of Bias (RoB) assessment for all the 24 included  
7 observational studies are given in **Annexure 3** and **Figure 2** respectively.

### 8 **3.2. Efficacy**

9 The improvement in the parameters such as mortality, ICU ward admission rate, need of  
10 mechanical ventilation (MV), Length of Hospital Stay (LOS), and Length of Hospital Stay in  
11 ICU (LOS-ICU) were considered for evaluating and concluding the efficacy of TCZ  
12 compared to control group in COVID-19 positive patients.

#### 13 **3.2.1. Mortality rate**

14 The COVID-19 positive patients treated with TCZ have shown a mortality rate of 24.3 %  
15 (448/1841), whereas the control group received SOC has a mortality rate of 31.2%  
16 (1079/3454). The outcomes of the meta-analysis have revealed that the TCZ treatment has  
17 reduced the mortality rate (Mantel-Haenszel (M-H), random effects risk difference (RE-RD)  
18 of -0.11 (-0.18 to -0.04), at 95% CI,  $p = 0.001$ ,  $I^2 = 88\%$ ) compared to control/SOC. The  
19 effect of TCZ on COVID-19 induced mortality of depicted in **Figure 3**.

#### 20 **3.2.2. ICU ward admission rate**

21 Six retrospective studies involving 542 patients in the TCZ treatment and 1595 patients in  
22 the control/SOC, with a total of 2137 COVID-19 positive patients were considered for the  
23 analysis. The outcomes of the meta-analysis revealed that there is a statistically significant  
24 difference observed between the TCZ and control/SOC treatments in reducing the incidences



1 of ICU ward admission rate (M-H, RE-RD of -0.06 (-0.23 to 0.12) at 95% CI,  $p=0.54$ ,  $I^2 =$   
2 93%). The results are given in **Figure 4**.

### 3 **3.2.3. need of Mechanical ventilation (MV)**

4 Twelve retrospective studies involving 756 patients in the TCZ treatment and 1052 patients  
5 in the control/SOC, with a total of 1808 COVID-19 positive patients were considered for the  
6 analysis. The outcomes have revealed that there is no difference between the TCZ and  
7 control/SOC group in the terms of need of mechanical ventilation during the hospitalization  
8 (M-H, RE-RD of 0.00 (-0.06 to 0.07) at 95% CI,  $p=0.96$ ,  $I^2 = 74%$ ). The forest plot analysis  
9 is depicted in **Figure 5**.

### 10 **3.2.4. Effect of TCZ on Length of Hospital Stay (LOS)**

11 The LOS was evaluated by considering the eight retrospective studies comprising of a total of  
12 2030 COVID-19 positive patients, of which 1395 (68.7%) patients were assigned to the TCZ  
13 treatment arm and 635 (31.2%) patients were into the control/SOC group. The results of the  
14 meta-analysis showed that there was substantial heterogeneity among the included studies  
15 ( $I^2=100%$ ) and there was no statistically significant difference in LOS (days), observed  
16 between the TCZ and control/SOC groups (Inverse variance (IV): -2.86 (-0.91 to 3.38) at  
17 95% CI,  $p=0.37$ ,  $I^2 = 100%$ ). The forest plot analysis for LOS is depicted in **Figure 6**.

### 18 **3.2.5. Effect of TCZ on Length of Hospital stay in ICU (LOS-ICU)**

19 The LOS-ICU was analyzed using three retrospective studies including a total of 1325  
20 COVID-19 positive patients, of which 308 (23.2%) patients were assigned to the TCZ + SOC  
21 treatment arm and 1017 (76.8%) patients were into the control/SOC group. The results of the  
22 meta-analysis showed that there was substantial heterogeneity among the included studies  
23 ( $I^2=100%$ ) and there was no statistically significant difference in LOS-ICU (days) observed  
24 between the TCZ and control/SOC groups (IV: -3.93 (-12.35 to 4.48) at 95% CI,  $p=0.36$ ,  $I^2 =$   
25 100%). The forest plot analysis for LOS is depicted in **Figure 7**.

1 **3.2.6. Incidence of Toclimuzab-induced infections**

2 **3.2.6 a. Super-infections**

3 The incidence of TCZ-induced super-infections was determined from the eight retrospective  
4 studies carried on 1,441 patients out of which 800 (55.5%) were under the control/SOC group  
5 and 641(44.4%) patients were considered under the TCZ group.

6 The meta-analysis revealed that the chances of super-infections are slightly high in the TCZ  
7 treated group compared to control/SOC (M-H, RE-RR of 1.59 (1.05, 2.41) at 95% CI,  
8  $p=0.03$ ,  $I^2 = 63\%$ ), however, there is a significant heterogeneity among the studies included  
9 for the analysis.

10 **3.2.6 b. Fungemia**

11 The incidence of TCZ-induced fungemia was determined from the three retrospective studies  
12 carried on 392 patients, out of which 194 (49.5%) were under the control group and  
13 198(50.5%) patients were assigned under the TCZ group. The meta-analysis revealed that  
14 there is no statistically significant difference among the TCZ and control/SOC groups  
15 observed in the incidences of fungemia (M-H, RE-RR of 1.68 (0.52, 5.47) at 95% CI,  $p=0.03$ ,  
16  $I^2 = 0\%$ ).

17 **3.1.6 c. Bacteremia**

18 The incidence of TCZ-induced bacteremia was determined from the four retrospective studies  
19 carried in 956 patients, out of which 571 (59.3%) patients were under the control/SOC group  
20 and 385 (40.2%) patients were assigned under the TCZ group. The outcomes of the meta-  
21 analysis showed no difference among the TCZ and control/SOC groups, in the incidences of  
22 bacteremia (M-H, RE-RR of 0.92 (0.51, 1.66) at 95% CI,  $p=0.78$ ,  $I^2 = 33\%$ ).

23 **3.2.6 d. Pneumonia**

24 This parameter was analyzed by considering the four retrospective studies carried on 897  
25 patients, out of which 538 (60%) were under the control group and 359(40%) patients were

1 assigned into the TCZ group. The outcomes of the analysis revealed that TCZ treated group  
2 has more chances of pneumonia compared to the control/SOC group (M-H, RE-RR of 1.88  
3 (1.33, 2.66) at 95% CI,  $p=0.0004$ ,  $I^2 = 0\%$ ).

4 In the summary, the incidence of super-infections, fungemia, bacteremia, and pneumonia  
5 were compared and analyzed between the TCZ and control/SOC groups by including a total  
6 of 3,686 patients out of which 2,103 (57.1%) were in the control/SOC group (never received  
7 TCZ) and 1,583 (42.9%) patients were assigned under TCZ group (received TCZ + SOC).  
8 Overall, the incidences of infections (super-infections, fungemia, bacteremia, and  
9 pneumonia) are considered to be high in the TCZ treated group compared to control/SOC (M-  
10 H, RE-RR of 1.49 (1.13, 1.96) at 95% CI,  $p=0.0004$ ), however, there is a substantial  
11 heterogeneity exists among the included studies ( $I^2=47\%$ ). The forest plot analysis of the  
12 incidence of TCZ-induced infections is depicted in **Figure 8**.

### 13 **3.2.7. Incidence of Toclimuzab-induced pulmonary thrombosis**

14 The incidence of pulmonary thrombosis was determined from the two retrospective studies  
15 carried on 193 patients, of which 97 (50.3%) patients were under the control/SOC group and  
16 96(49.7%) patients were assigned under the TCZ group (received at least one dose of TCZ).  
17 The outcomes of the analysis revealed that there was no significant difference in the  
18 incidences of pulmonary thrombosis between TCZ and control/SOC treated groups (M-H,  
19 fixed effect odds ratio (FE-OR) of 1.01 (0.45 to 2.26) at 95% CI,  $p=0.99$ ,  $I^2 = 0\%$ ). The forest  
20 plot analysis of the incidence of TCZ-induced pulmonary thrombosis is depicted in **Figure 9**.

## 21 **4. Discussion**

22 This systematic review and meta-analysis were performed to collect, analyze, interpret and  
23 conclude the efficacy and safety of TCZ in the treatment of COVID-19 positive subjects.  
24 Since the emergence of the pandemic, globally the scientists are in search of a medicine or  
25 treatment strategy to combat or manage the pandemic and thereby reduce the social-economic

1 burden throughout the world [14]. Many multi-national organizations, research organizations,  
2 and academic researchers are extensively working on developing an effective treatment for  
3 COVID-19 [15]. As of now, it has been symptomatically managed by using already existing  
4 medications such as antivirals (remdesivir, oseltamivir, etc.), anti-pyretic (paracetamol), anti-  
5 histaminic (cetirizine,), antibiotics (cephalosporins), corticosteroids (prednisolone,  
6 methylprednisolone), monoclonal antibodies (tocilizumab, imatinib) [16]. In this context, the  
7 IL-6 antagonists are considered to have better therapeutic benefits in the symptomatic  
8 management of COVID-19, in these lines, TCZ is considered as one of the most commonly  
9 used medication to suppress the cytokine storm in COVID-19 patients [17]. There are  
10 multiple case series, retrospective, and prospective studies available on the therapeutic role of  
11 TCZ in COVID-19. Also, there are few meta-analysis reports published related to the  
12 therapeutic use of TCZ in COVID-19. However, this study was focused to provide an overall  
13 view on the efficacy and safety of TCZ in COVID-19 patients considering the retrospective  
14 studies/reports available on the topic till October 2020.

15 Based on the inclusion and exclusion criteria a total of 24 retrospective studies were selected  
16 for this study, comprising of 5686 COVID-19 positive patients. The parameters such as  
17 mortality, ICU ward admission rate, need of Mechanical ventilation, Length of Hospital Stay,  
18 Length of Hospital stay in ICU, Incidence of super-infections such as fungemia, bacteremia,  
19 pneumonia, and pulmonary thrombosis were considered for systematic review and meta-  
20 analysis.

21 The available literature favors the benefit of TCZ in minimizing the COVID-19 induced  
22 mortality [18, 19, 20, 21]. In this study, 22 included studies have reported mortality as a  
23 parameter of which 16 studies have supported the use of TCZ in minimizing the mortality,  
24 and 6 studies have shown results in the favor of control. The outcome of the meta-analysis

1 revealed that the administration of TCZ could benefit the COVID-19 positive patients in  
2 minimizing the COVID-19 induced mortality.

3 Further, among the hospitalized COVID-19 positive patients about 5-10% population  
4 requires ICU admission [22,23]. In this regard, some of the available reports have supported  
5 the use of TCZ in reducing the incidences of ICU admission [22, 24, 25]. However, the  
6 outcomes of the present meta-analysis showed that there is no significant difference between  
7 the TCZ and control/SOC groups in the incidences of ICU admission among the COVID-19  
8 infected patients.

9 Moreover, about 89.9% of ICU cases and 20.2% of hospitalized COVID-19 positive patients  
10 require mechanical ventilation (Invasive and/or Non-invasive) [26], and the role of TCZ in  
11 reducing the need for MV has been evaluated in multiple studies [27, 28, 29,30, 31]. In the  
12 present study, 12 retrospective studies reporting the MV as a parameter were included, of  
13 these 12 studies, 7 studies have reported in favor of TCZ, 5 studies have reported in the  
14 favors of control/SOC and 1 study was neutral. The outcomes of the meta-analysis revealed  
15 that the need for MV is the same between TCZ and control/SOC treated groups.

16 Besides, length of stay (LOS and LOS-ICU) is the one of important parameters considered  
17 for evaluating the efficacy in COVID-19 patients. As per the available data, the median LOS  
18 was found to be 4 to 21 days (outside China) and median LOS-ICU was found to be 4 to 19  
19 days (outside China) [32]. In this regard, 8 studies reporting LOS and 3 studies reporting  
20 LOS-ICU were included in the present study. On the overview, the TCZ treatment has shown  
21 benefit in minimizing the LOS and LOZ-ICU compared to control/SOC. However, there was  
22 no statistically significant difference observed between the TCZ and control/SOC groups, due  
23 to the significant heterogeneity ( $I^2 = 100\%$ ) associated with the included studies.

24 On the other hand, the safety of TCZ is the prime concern while administering to COVID-19  
25 patients. The available literature suggests that TCZ administration can cause adverse (AEs)

1 and serious adverse events (SAEs) such as super-infections, fungemia, bacteremia,  
2 pneumonia, pulmonary thrombosis, and so on [30, 33, 34, 35, 36, 37]. Therefore, the  
3 incidences of events such as these adverse events were compared between the TCZ and  
4 control/SOC treated groups using the 9 included studies. The outcomes of the meta-analysis  
5 revealed that the TCZ administration has higher chances of producing the events such as  
6 super-infections, fungemia, bacteremia, pneumonia, and pulmonary thrombosis compared to  
7 control/SOC.

8 Further, we found that there are 7 systematic reviews and meta-analyses published on the role  
9 of tocilizumab in the treatment of COVID-19 [45, 46, 47, 48,49, 50, 51]. However, a meta-  
10 analysis published by Aziz et al [45] has a close association with this meta-analysis. Aziz et  
11 al., included 23 studies involving 6279 patients, and the parameters such as mortality, need for  
12 mechanical ventilation, ICU admission, and secondary infections were considered as parameters [45].  
13 However, we have included additional parameters such a LOS, LOS-ICU, role of TCZ treatment on  
14 incidences of super-infections, and also evaluated the incidences of TCZ-induced pulmonary  
15 thrombosis. In addition, our analysis has a greater number of studies in the parameters like mortality  
16 and the need for mechanical ventilation. Lastly, in the conclusion section Aziz et al., have stated that  
17 TCZ treatment has the potential to decrease the mortality rate in severe COVID-19 patients without  
18 causing a significant increase in the infection rate [45].

19 Commenting on other meta-analysis works, Zhao et. al, have performed a meta-analysis to  
20 evaluate the efficacy of TCZ treatment in severe COVID-19 patients including 10 studies,  
21 comprising 1675 patients. Mortality, admission to ICU, safety, and efficacy were considered  
22 for analysis. This study has concluded that TCZ treatment could reduce mortality  
23 significantly compared to control/SOC in severe COVID-19 patients [46]. Further, the meta-  
24 analysis performed by Liu et. al., has included 28 studies consisting of 991 COVID-19  
25 confirmed patients receiving TCZ. Based on the meta-analysis, authors have concluded that  
26 TCZ could improve the clinical outcome of COVID-19 patients, particularly TCZ

1 administration has reduced the death rate in severe COVID-19 cases [47]. Moreover, Surjit  
2 Singh et. al have performed a meta-analysis related to the safety and efficacy of TCZ in  
3 COVID-19 patients, they have included a total of 13 observational studies comprising 2750  
4 patients. The parameters like mortality, ICU admission, hospital discharge, clinical  
5 improvement, secondary bacteremia, secondary pneumonia, or superinfections were  
6 considered for analysis. Based on the detailed analysis Surjit Singh et. al has concluded that  
7 there is a 46% decrease in mortality rate, and a 66% decrease in the progression of diseases in  
8 TCZ treated group compared to the group receiving standard of care (SOC) [48]. Besides,  
9 Boregowda et. al. included 16 studies consisting of 3641 patients. Based on the analysis the  
10 authors have concluded that the addition of TCZ to the standard regimen could reduce the  
11 mortality in severe COVID-19 patients, which is coinciding with our conclusion of reducing  
12 the risk of mortality upon treating with TCZ [49]. On the other hand, Kotak S et al carried a  
13 meta-analysis including 13 studies consists of a total of 766 patients, and the parameters such  
14 as mortality, need for artificial invasive ventilation requirement, ICU admission rate, risk of  
15 post-drug infection, improved oxygen saturation were considered for analysis. Authors have  
16 concluded that TCZ is safe and effective in reducing mortality among critically ill COVID-19  
17 patients. However, this study has study very limited numbers of observations. However, a  
18 systematic review performed by Lan et al. has concluded that the available pieces of evidence  
19 not strong enough to derive a conclusive decision about the benefit of TCZ in treating  
20 COVID-19 and associated health complications. They have included 7 retrospective studies  
21 comprising of 592 adult COVID-19 patients. The parameters such as mortality, risk of ICU  
22 admission, and need for mechanical ventilation were considered and the outcomes [51].  
23 Overall, based on the outcomes of this meta-analysis we can conclude that the administration  
24 of TCZ would reduce the risk of mortality, and however, there is no much difference  
25 observed between the TCZ and SOC/control groups in other parameters such as ICU

1 admission rate, need of mechanical ventilation and length of hospital stay (ICU and Non-  
2 ICU). On the other hand, TCZ treated subjects possess higher chances of adverse events like  
3 super-infections, fungemia, bacteremia, pneumonia, and pulmonary thrombosis compared to  
4 the control/SOC group.

## 5 **5. Conclusions**

6 This meta-analysis was performed using retrospective clinical reports on the use of TCZ in  
7 COVID-19, and based on the outcomes of the meta-analysis we can conclude that  
8 administration of TCZ would reduce the risk of mortality, and however, there is no much  
9 difference observed between the TCZ and SOC/control groups in other parameters such as  
10 ICU admission rate, need of mechanical ventilation and length of hospital stay (ICU and  
11 Non-ICU). On the other hand, TCZ treated subjects possess higher chances of super-  
12 infections and pneumonia compared with SOC/control group. All the included studies have  
13 passed the quality assessment and showed a low risk of bias. However, the major limitation  
14 of this study is the significant heterogeneity observed in the outcomes due to multiple  
15 confounding factors, and hence there is a need for multi-centric randomized trials involving a  
16 large COVID-19 patient population, proper adjustment of confounders like SOC medications  
17 to determine the potential therapeutic role of TCZ in mitigating COVID-19 and associated  
18 health complications.

## 19 **6. Limitations**

20 Though the meta-analysis of the available evidence supports the benefit of TCZ in  
21 minimizing the COVID-19-induced mortality and other complications compared to  
22 SOC/placebo/control. There was a moderate to significant heterogeneity observed in the  
23 outcomes of the various parameters evaluated. Interestingly, the observed heterogeneity  
24 between the included studies is due to multiple reasons as highlighted below. All the included  
25 studies are observational, and the confounders associated with one or two included studies



1 may also influence the outcomes to a large extent. Besides, since there was no specific  
2 treatment available for COVID-19 (before the approval of vaccine), the therapies are  
3 dynamically evolving with each passing day, therefore the comparator group or standard of  
4 care (SOC) or control group has varied significantly from study to study, this is also one of  
5 the potential causes for heterogeneity observed. Lastly, there was no standard treatment  
6 regimen available for tocilizumab use in the included studies, like there is the difference in  
7 dosage regimen (strength and number of doses), route of administration, time of  
8 administration, age, and gender difference. These are some of the possible reasons for  
9 significant heterogeneity observed in the outcomes of the present study.

10 **Conflicts of Interest statement:** Authors declares that they have no conflicts of interest

11

## 12 **References**

- 13 1. Bogoch, II, Watts A, Thomas-Bachli A, Huber C, Kraemer MUG, Khan K. Pneumonia  
14 of unknown aetiology in Wuhan, China: potential for international spread via  
15 commercial air travel. J Travel Med. 2020;27.
- 16 2. World Health Organization. Coronavirus disease 2019 (COVID-19): Situation Report—  
17 51, 2020
- 18 3. Zhao S, Lin Q, Ran J, Musa SS, Yang G, Wang W, et al. Preliminary estimation of the  
19 basic reproduction number of novel coronavirus (2019-nCoV) in China, from 2019 to  
20 2020: A datadriven analysis in the early phase of the outbreak. Int J Infect Dis.  
21 2020;92:214-4.
- 22 4. <https://www.health.harvard.edu/diseases-and-conditions/treatments-for-covid-19>
- 23 5. <https://reference.medscape.com/drug/bamlanivimab-4000141>
- 24 6. <https://www.who.int/news-room/q-a-detail/coronavirus-disease-covid-19-dexamethasone>

- 1 7. Kantarjian H, Oki Y, Garcia-Manero G, Huang X, O'Brien S, Cortes J, Faderl S, Bueso-  
2 Ramos C, Ravandi F, Estrov Z, Ferrajoli A, Wierda W, Shan J, Davis J, Giles F, Saba  
3 HI, Issa JP. Results of a randomized study of 3 schedules of low-dose decitabine in  
4 higher-risk myelodysplastic syndrome and chronic myelomonocyticleukemia. *Blood*.  
5 2007 Jan 1;109(1):52-7.
- 6 8. <https://clinicaltrials.gov/ct2/show/NCT04372602>.
- 7 9. <https://clinicaltrials.gov/ct2/show/NCT04425538>
- 8 10. Shimizu M, . Clinical Features of Cytokine Storm Syndrome. *In: Cron RQ, Behrens EM,*  
9 *eds. Cytokine Storm Syndrome*. Cham, Springer International Publishing, 2019; *pp.* 31–  
10 41.
- 11 11. Hoiland RL, Stukas S, Cooper J, et al. Amelioration of COVID-19 related cytokine  
12 storm syndrome: Parallels to chimeric antigen receptor-T cell cytokine release  
13 syndrome. *Br J Haematol* 2020; **190**: e150–e154.
- 14 12. Hojyo, S., Uchida, M., Tanaka, K. et al. How COVID-19 induces cytokine storm with  
15 high mortality. *InflammRegener* 40, 37 (2020).
- 16 13. <https://clinicaltrials.gov/ct2/results?cond=COVID-19>
- 17 14. Sarkar C, Mondal M, Torequl Islam M, Martorell M, Docea AO, Maroyi A, Sharifi-Rad  
18 J and Calina D (2020) Potential Therapeutic Options for COVID-19: Current Status,  
19 Challenges, and Future Perspectives. *Front. Pharmacol.* 11:572870. doi:  
20 10.3389/fphar.2020.572870.
- 21 15. [https://www.who.int/emergencies/diseases/novel-coronavirus-2019/global-research-on-](https://www.who.int/emergencies/diseases/novel-coronavirus-2019/global-research-on-novel-coronavirus-2019-ncov/solidarity-clinical-trial-for-covid-19-treatments)  
22 [novel-coronavirus-2019-ncov/solidarity-clinical-trial-for-covid-19-treatments](https://www.who.int/emergencies/diseases/novel-coronavirus-2019/global-research-on-novel-coronavirus-2019-ncov/solidarity-clinical-trial-for-covid-19-treatments)
- 23 16. [https://www.cdc.gov/coronavirus/2019-ncov/hcp/clinical-guidance-management-](https://www.cdc.gov/coronavirus/2019-ncov/hcp/clinical-guidance-management-patients.html)  
24 [patients.html](https://www.cdc.gov/coronavirus/2019-ncov/hcp/clinical-guidance-management-patients.html)

- 1 17. Guillen, L., Padilla, S., Fernandez, M. Vanesa Agullo V, García JA, Telenti G,  
2 García-Abellan J, Botella A, Gutiérrez F, Masia M. Preemptive interleukin-6 blockade in  
3 patients with COVID-19. *Sci Rep* **10**, 16826 (2020). [https://doi.org/10.1038/s41598-020-](https://doi.org/10.1038/s41598-020-74001-3)  
4 74001-3.
- 5 18. Andrew IP, Berry DA, Hansen E, Goy AH, Pecora AL, Sinclair BA, et al. (2020)  
6 Hydroxychloroquine and tocilizumab therapy in COVID-19 patients—An observational  
7 study. *PLoS ONE* 15(8): e0237693. <https://doi.org/10.1371/journal.pone.0237693>.
- 8 19. Rossi, B., Nguyen, L. S., Zimmermann, P., Boucenna, F., Dubret, L., Baucher, L.,  
9 Guillot, H., Bouldouyre, M. A., Allenbach, Y., Salem, J. E., Barsoum, P., Oufella, A., &  
10 Gros, H. (2020). Effect of Tocilizumab in Hospitalized Patients with Severe COVID-19  
11 Pneumonia: A Case-Control Cohort Study. *Pharmaceuticals* (Basel, Switzerland),  
12 13(10), 317. <https://doi.org/10.3390/ph13100317>
- 13 20. Zheng KL, Xu Y, Guo YF, *et al.*. Efficacy and safety of tocilizumab in COVID-19  
14 patients. *Aging* (Albany NY). 2020 Oct 8;12(19):18878-18888.
- 15 21. Capra R, De Rossi N, Mattioli F, Romanelli G, Scarpazza C, Sormani MP, Cossi S.  
16 Impact of low dose tocilizumab on mortality rate in patients with COVID-19 related  
17 pneumonia. *Eur J Intern Med*. 2020 Jun;76:31-35.
- 18 22. Moreno-García E, Caballero VR, Albiach L, *et al.*, Tocilizumab is associated with  
19 reduction of the risk of ICU admission and mortality in patients with SARS-CoV-2  
20 infection. *medRxiv* 2020.06.05.20113738.
- 21 23. Martínez-Sanz J, Muriel A, Ron R, Herrera S, Pérez-Molina JA, Moreno S, Serrano-  
22 Villar S. Effects of tocilizumab on mortality in hospitalized patients with COVID-19: a  
23 multicentre cohort study. *Clin Microbiol Infect*. 2020 Sep 23:S1198-743X(20)30573-5.
- 24 24. Roumier M, Paule R, Groh M, Vallée A, Ackermann F. Interleukin-6 blockade for  
25 severe COVID-19. *medRxiv* 2020.04.20.20061861.

- 1 25. Klopfenstein T, Zayet S, Lohse A, *et al.*, HNF Hospital Tocilizumab multidisciplinary  
2 team. Tocilizumab therapy reduced intensive care unit admissions and/or mortality in  
3 COVID-19 patients. *Med Mal Infect.* 2020 Aug;50(5):397-400.
- 4 26. Richardson S, Hirsch JS, Narasimhan M, Crawford JM, McGinn T, Davidson KW, *et al.*  
5 Presenting characteristics, comorbidities, and outcomes among 5700 patients  
6 hospitalized with COVID-19 in the New York city area. *JAMA* 2020;323:2052–2059.
- 7 27. Rossi B, Nguyen LS, Zimmermann P, *et al.*,. Effect of tocilizumab in hospitalized  
8 patients with severe pneumonia COVID-19: a cohort study. *medRxiv*  
9 2020.06.06.20122341.
- 10 28. Guaraldi G, Meschiari M, Cozzi-Lepri A, *et al.*, Tocilizumab in patients with severe  
11 COVID-19: a retrospective cohort study. *Lancet Rheumatol.* 2020 Aug;2(8):e474-e484.
- 12 29. Mikulska M, Nicolini LA, Signori A, *et al.*, Tocilizumab and steroid treatment in  
13 patients with severe Covid-19 pneumonia. *medRxiv* 2020.06.22.20133413.
- 14 30. Kewan T, Covut F, Al-Jaghbeer MJ, Rose L, Gopalakrishna KV, Akbik B. Tocilizumab  
15 for treatment of patients with severe COVID-19: A retrospective cohort study.  
16 *EClinicalMedicine.* 2020 Jun 20;24:100418.
- 17 31. Gokhale Y, Mehta R, Karnik N, Kulkarni U, Gokhale S. Tocilizumab improves survival  
18 in patients with persistent hypoxia in severe COVID-19 pneumonia. *EClinicalMedicine.*  
19 2020 Jul 16;24:100467.
- 20 32. Rees, E.M., Nightingale, E.S., Jafari, Y. *et al.* COVID-19 length of hospital stay: a  
21 systematic review and data synthesis. *BMC Med* 18, 270 (2020).  
22 <https://doi.org/10.1186/s12916-020-01726-3>.
- 23 33. Campochiaro C, Della-Torre E, Cavalli G, *et al.*,. Efficacy and safety of tocilizumab in  
24 severe COVID-19 patients: a single-centre retrospective cohort study. *Eur J Intern Med.*  
25 2020 Jun;76:43-49.

- 1 34. Rojas-Marte G, Khalid M, Mukhtar O, *et al.*,. Outcomes in patients with severe COVID-  
2 19 disease treated with tocilizumab: a case-controlled study. QJM. 2020 Aug  
3 1;113(8):546-550.
- 4 35. Somers EC, Eschenauer GA, Troost JP, *et al.*,. Tocilizumab for treatment of  
5 mechanically ventilated patients with COVID-19. Clin Infect Dis. 2020 Jul 11:ciaa954.
- 6 36. Canziani LM, Trovati S, Brunetta E, Testa A, *et al.*,. Interleukin-6 receptor blocking  
7 with intravenous tocilizumab in COVID-19 severe acute respiratory distress syndrome:  
8 A retrospective case-control survival analysis of 128 patients. J Autoimmun. 2020  
9 Nov;114:102511.
- 10 37. Pettit NN, Nguyen CT, Mutlu GM, Wu D, Kimmig L, Pitrak D, Pursell K. Late onset  
11 infectious complications and safety of tocilizumab in the management of COVID-19. J  
12 Med Virol. 2020 Aug 13:10.1002/jmv.26429.
- 13 38. Quartuccio L, Sonaglia A, McGonagle D, *et al.*,. Profiling COVID-19 pneumonia  
14 progressing into the cytokine storm syndrome: Results from a single Italian Centre study  
15 on tocilizumab versus standard of care. J Clin Virol. 2020 Aug; 129:104444.
- 16 39. Colaneri M, Bogliolo L, Valsecchi P, *et al.*,. Tocilizumab for Treatment of Severe  
17 COVID-19 Patients: Preliminary Results from SMAtteo COvid19 REgistry  
18 (SMACORE). Microorganisms. 2020 May 9;8(5):695.
- 19 40. Wadud N, Ahmed N, Shergil M, *et al.*,. Improved survival outcome in SARs-CoV-2  
20 (COVID-19) Acute Respiratory Distress Syndrome patients with Tocilizumab  
21 administration. medRxiv 2020.05.13.20100081.
- 22 41. De Rossi N, Scarpazza C, Filippini C, *et al.*,. Early use of low dose tocilizumab in  
23 patients with COVID-19: A retrospective cohort study with a complete follow-up.  
24 EClinicalMedicine. 2020 Aug;25:100459.

- 1 42. Moreno-Pérez O, Andres M, Leon-Ramirez JM, Sánchez-Payá J, Rodríguez JC, Sánchez  
2 R, García-Sevila R, Boix V, Gil J, Merino E. Experience with tocilizumab in severe  
3 COVID-19 pneumonia after 80 days of follow-up: A retrospective cohort study. *J*  
4 *Autoimmun.* 2020 Nov;114:102523.
- 5 43. Ramaswamy M, Mannam P, Comer R, Sinclair E, McQuaid DB, Schmidt ML. Off-  
6 Label Real World Experience Using Tocilizumab for Patients Hospitalized with  
7 COVID-19 Disease in a Regional Community Health System: A Case-Control Study.  
8 *medRxiv* 2020.05.14.20099234.
- 9 44. Biran N, Ip A, Ahn J, *et al.*,. Tocilizumab among patients with COVID-19 in the  
10 intensive care unit: a multicentre observational study. *Lancet Rheumatol.* 2020  
11 Oct;2(10):e603-e612.
- 12 45. Aziz M, Haghbin H, Abu Sitta E, *et al.* Efficacy of tocilizumab in COVID-19: A  
13 systematic review and meta-analysis. *J Med Virol.* 2021; 93:1620-1630.  
14 <https://doi.org/10.1002/jmv.26509>.
- 15 46. Zhao J, Cui W, Tian BP. Efficacy of tocilizumab treatment in severely ill COVID-19  
16 patients. *Crit Care.* 2020 Aug 27;24(1):524. doi: 10.1186/s13054-020-03224-7. PMID:  
17 32854738; PMCID: PMC7450680.
- 18 47. Liu L, Zong S, Li J, *et al.* Efficacy and safety of tocilizumab in COVID-19 patients: A  
19 Meta-Analysis. *Research Square*; 2020. DOI: 10.21203/rs.3.rs-50446/v1
- 20 48. Surjit Singh, Daisy Khera, Ankita Chugh, Niti Mittal, Rakesh Mittal, Vinay Kumar  
21 Chugh. Efficacy and Safety of Tocilizumab in the Treatment of SARS-CoV-2: A  
22 Systematic Review and Meta-analysis. *Research Square* DOI:  
23 <https://doi.org/10.21203/rs.3.rs-59511/v1>
- 24 49. Boregowda U, Perisetti A, Nanjappa A, Gajendran M, Kutti Sridharan G, Goyal H.  
25 Addition of Tocilizumab to the Standard of Care Reduces Mortality in Severe COVID-

- 1 19: A Systematic Review and Meta-Analysis. *Front Med (Lausanne)*. 2020 Oct  
2 2;7:586221. doi: 10.3389/fmed.2020.586221. PMID: 33123544; PMCID: PMC7566918.
- 3 50. Kotak S, Khatri M, Malik M, Malik M, Hassan W, Amjad A, Malik F, Hassan H,  
4 Ahmed J, Zafar M. Use of Tocilizumab in COVID-19: A Systematic Review and Meta-  
5 Analysis of Current Evidence. *Cureus*. 2020 Oct 9;12(10):e10869. doi:  
6 10.7759/cureus.10869. PMID: 33178522; PMCID: PMC7652362.
- 7 51. Lan SH, Lai CC, Huang HT, Chang SP, Lu LC, Hsueh PR. Tocilizumab for severe  
8 COVID-19: a systematic review and meta-analysis. *Int J Antimicrob Agents*. 2020  
9 Sep;56(3):106103. doi: 10.1016/j.ijantimicag.2020.106103. Epub 2020 Jul 23. PMID:  
10 32712333; PMCID: PMC7377685.

11

**Table 1. Description of Included studies**

| Sl. No | Author name                 | Study Design                                     | The population included in the study                                                                                                                                                                                                                                                             | Total No. of patients (Control + TCZ) | Control group                       | Tocilizumab (TCZ) Treatment            | Parameters                                                                                           | Funding | Adjustments in The Analysis (statistical analysis)    |
|--------|-----------------------------|--------------------------------------------------|--------------------------------------------------------------------------------------------------------------------------------------------------------------------------------------------------------------------------------------------------------------------------------------------------|---------------------------------------|-------------------------------------|----------------------------------------|------------------------------------------------------------------------------------------------------|---------|-------------------------------------------------------|
| 1      | Andrew IP et al., 2020 [18] | Retrospective, observational, multicenter cohort | 1) Positive SARS-CoV-2 patients<br>2) Hospitalized within the time frame of March 1, 2020, until May 5, 2020,<br>3) Non-pregnant,<br>4) Not on a randomized clinical trial, and<br>5) Did not die during the first day of hospitalization, and<br>5) Were not discharged to home within 24 hours | N= 547                                | n=413, at least 1 dose of TCZ + SOC | n=134, TCZ                             | Mortality, oxygenation, ferritin, D-dimer, ICU admission and                                         | Nil     | Chi-square test and Unadjusted Kaplan-Meier estimates |
| 2      | Biran N et al.,2020[44]     | Retrospective, observational, multicenter cohort | 1). Adult patients (aged $\geq 18$ years) with a positive SARS-CoV-2 diagnosis by RT-PCR.<br>2) hospitalized during the study period and required ICU support                                                                                                                                    | N=764                                 | n=554, SOC                          | n=210, TCZ-400mg-IV, Single-dose + SOC | Mortality, the Serum concentration of CRP, Oxygen support, qSOFA score.<br>Time frame: up to 60 days | Nil     | Propensity score-matching and Pearson chi-square test |



| Sl. No | Author name                    | Study Design               | The population included in the study                                                                                                                                                                                                                                                                                                                                                                | Total No. of patients (Control + TCZ) | Control group                                                                                                                    | Tocilizumab (TCZ) Treatment          | Parameters                                                                                                                    | Funding | Adjustments in The Analysis (statistical analysis)                                                                                                                                               |
|--------|--------------------------------|----------------------------|-----------------------------------------------------------------------------------------------------------------------------------------------------------------------------------------------------------------------------------------------------------------------------------------------------------------------------------------------------------------------------------------------------|---------------------------------------|----------------------------------------------------------------------------------------------------------------------------------|--------------------------------------|-------------------------------------------------------------------------------------------------------------------------------|---------|--------------------------------------------------------------------------------------------------------------------------------------------------------------------------------------------------|
| 3      | Campocharo C et al., 2020 [33] | Retrospective Cohort       | 1) COVID-19 confirmed upon RT-PCR positivity for SARS-CoV-2.<br>2) elevation in either C-reactive protein (CRP, $\geq 100$ mg/L) or ferritin ( $\geq 900$ ng/mL), in the presence of increased lactate dehydrogenase (LDH, $> 220$ U/L);<br>3) severe respiratory radiological findings at chest X-ray and/or computed tomography (CT) scan<br>4) oxygen saturation (SaO <sub>2</sub> ) $\leq 92\%$ | N=65                                  | n=33, HCQ - 400 mg, OD daily +LPV/r/RTV/r 400/100 mg BD + Ceftriaxone 2 gr for 6 days +AZT 500 mg daily + oxaparin 4000UI, SC OD | n=32, TCZ- 400mg, one/two IV dose    | Mortality, the cumulative incidence of clinical, discharge from hospital, improvement, CRP, vitals. Time frame: Up to 30 days | Nil     | Wilcoxon rank-sum tests for continuous variables and two-tailed Fisher's exact test for categorical variables. Kaplan-Meier survival analysis, log-rank test was used to compare survival curves |
| 4      | Canziani LM et al., 2020[36]   | Retrospective case-control | 1) Hospitalized patients with COVID-19 pneumonia<br>2) Clinical worsening in the                                                                                                                                                                                                                                                                                                                    | N=128                                 | n=64, enoxaparin, SC + LPV/r 400 mg + RTV/r 100 mg                                                                               | n=64, TCZ- 8mg/kg, IV, one/two doses | Mortality, PaO <sub>2</sub> :FiO <sub>2</sub> , MV, IMV, Creatinine, D-dimer, Ferritin, Fibrinogen, Procalcitonin,            | Nil     | Chi-square test and Mann-Whitney test were used                                                                                                                                                  |

| Sl. No | Author name             | Study Design                      | The population included in the study                                                                                                                                                                                                                                                       | Total No. of patients (Control + TCZ) | Control group                                                              | Tocilizumab (TCZ) Treatment             | Parameters                                                                       | Funding | Adjustments in The Analysis (statistical analysis)                                         |
|--------|-------------------------|-----------------------------------|--------------------------------------------------------------------------------------------------------------------------------------------------------------------------------------------------------------------------------------------------------------------------------------------|---------------------------------------|----------------------------------------------------------------------------|-----------------------------------------|----------------------------------------------------------------------------------|---------|--------------------------------------------------------------------------------------------|
|        |                         |                                   | previous 24 h with an increasing need for oxygen or ventilatory support, 3) Absence of clinical or biochemical signs of an active bacterial infection, 4) Elevated C reactive protein, 5) A higher risk for mortality at blood tests.                                                      |                                       | BD/darunavir 800 mg + cobicistat 150 mg OD + HCQ 200 mg, BD                |                                         | LDH, IL-6, Hematology, INR, [Time Frame: up to 30 days]                          |         | according to the type of variable. Kaplan–Meier estimates were used for mortality analysis |
| 5      | Capra R et al.,2020[21] | Retrospective observational study | 1) COVID-19 confirmed upon RT-PCR, along with atleast one of the following conditions: 1) respiratory rate $\geq$ 30 breaths/min, 2) peripheral capillary oxygen saturation (SpO <sub>2</sub> ) $\leq$ 93% while breathing room air, 3) PaO <sub>2</sub> /FiO <sub>2</sub> $\leq$ 300 mmHg | N=85                                  | n=23, SOC (HCQ 400 mg daily and LPV/r 800 mg daily plus RTV/r 200 mg daily | n=62, Tocilizumab-400/324mg-IV/SC + SOC | Mortality, LOS, Clinical Improvement, No of discharges Time frame: up to 14 days | Nil     | Kaplan–Meier survival analysis                                                             |

| Sl. No | Author name                  | Study Design               | The population included in the study                                                                                          | Total No. of patients (Control + TCZ) | Control group                                                                                              | Tocilizumab (TCZ) Treatment                | Parameters                                                                                                                                   | Funding | Adjustments in The Analysis (statistical analysis)                                                                        |
|--------|------------------------------|----------------------------|-------------------------------------------------------------------------------------------------------------------------------|---------------------------------------|------------------------------------------------------------------------------------------------------------|--------------------------------------------|----------------------------------------------------------------------------------------------------------------------------------------------|---------|---------------------------------------------------------------------------------------------------------------------------|
| 6      | Colaneri M et al., 2020 [39] | Retrospective              | 1) Hospitalized patients with COVID-19 pneumonia                                                                              | N=112                                 | n=91, SOC (HCQ - 200 mg bid + AZT -500 mg OD, LMWH ± methylprednisolone - 1 mg/kg up to 80 mg for 10 days) | n=21, TCZ - 8mg/kg IV, One/Two doses + SOC | Mortality, ICU Admission, INR, LDH, Lymphocytes, Neutrophils, ALT, CRP, procalcitonin, platelets, P/F ratio [ Time Frame: day 0, Day 7]      | Nil     | Propensity Score Matching. Multiple imputations with predictive mean matching using the chained equation for missing data |
| 7      | De Rossi N et al.,2020 [41]  | Retrospective cohort study | 1) COVID-19 confirmed upon RT-PCR<br>2) bilateral pulmonary interstitial opacities on chest imaging<br>3) Respiratory failure | N=158                                 | n=68, SOC, (HCQ- 400 mg daily + LPV/r 800 mg + RTV/r 200 mg per day).                                      | n=90, TCZ - 400 mg IV or 324 mg SC + SOC   | Mortality, Vitals, CRP, Procalcitonin, Hematology, LFTs, Creatinine-kinase, LDH, Coagulation Parameters<br>The need for Respiratory Support. | Nil     | Kaplan–Meier survival analysis                                                                                            |
| 8      | Gokhale Y et al.,2020 [31]   | Retrospective Cohort       | 1) Patients with severe COVID-19 pneumonia with lung infiltrates,                                                             | N=161                                 | n=91, SOC (antibiotics, HCQ 400 mg + Ivermectin                                                            | n=70, TCZ- 400mg-IV along with SOC         | Mortality, CRP. LOS, Ventilation. Time frame: up to 50 days                                                                                  | Nil     | Multivariate Cox regression analysis                                                                                      |

| Sl. No | Author name                | Study Design                              | The population included in the study                        | Total No. of patients (Control + TCZ) | Control group                                                                                                                                                                   | Tocilizumab (TCZ) Treatment                                        | Parameters                                                                                                  | Funding | Adjustments in The Analysis (statistical analysis)                                                                   |
|--------|----------------------------|-------------------------------------------|-------------------------------------------------------------|---------------------------------------|---------------------------------------------------------------------------------------------------------------------------------------------------------------------------------|--------------------------------------------------------------------|-------------------------------------------------------------------------------------------------------------|---------|----------------------------------------------------------------------------------------------------------------------|
|        |                            |                                           | elevated inflammatory markers and persistent hypoxia        |                                       | 12 mg once daily,<br>Oseltamivir 75 mg twice daily + LMVH 1 mg/kg SC once daily + methylprednisolone 125 500 mg intravenously once daily)                                       |                                                                    |                                                                                                             |         |                                                                                                                      |
| 9      | Guaraldi G et al.,2020[28] | Retrospective, observational cohort study | 1) Adults ( $\geq 18$ years) with severe COVID-19 pneumonia | N=544                                 | n=365, HCQ-400 mg BD on D1, followed by 200 mg BD on days 2–5 $\pm$ AZT 500 mg OD for 5 days +LPV/r–RTV/r (400/100 mg BD/darunavir–cobicistat (800/150 mg OD for 14 days + LMVH | n=179, TCZ-162 mg, SC, n=88, TCZ - 8 mg/kg bodyweight, (Max 800mg) | Mortality, Incidence of MV, CRP, IL-6, D-dimers, Ferritin, Lymphocyte count, WBC. Time frame: up to 20 days | Nil     | Adjusted for age, sex, recruiting center, duration of symptoms, and Subsequent Organ Failure Assessment (SOFA) score |

| Sl. No | Author name                    | Study Design                     | The population included in the study                            | Total No. of patients (Control + TCZ) | Control group | Tocilizumab (TCZ) Treatment              | Parameters                                                                                                                                                                                | Funding | Adjustments in The Analysis (statistical analysis)                                                                                                                                              |
|--------|--------------------------------|----------------------------------|-----------------------------------------------------------------|---------------------------------------|---------------|------------------------------------------|-------------------------------------------------------------------------------------------------------------------------------------------------------------------------------------------|---------|-------------------------------------------------------------------------------------------------------------------------------------------------------------------------------------------------|
| 10     | Kewan T et al., 2020 [30]      | Retrospective cohort study       | 1) Hospitalized, Adults ( $\geq 18$ years) with severe COVID-19 | N=51                                  | n=23, SOC     | n=28, TCZ-4-8mg/kg-IV+ prednisone-50mg   | Mortality, LOS, LOS in ICU, Hematology, Clinical improvement, oxygen therapy, LFTs, CRP and IL-6, D-dimers, Fibrinogen, Ferritin, Creatinine, Troponin, vitals. Time frame: up to 30 days | Nil     | Continuous variables were compared using the Wilcoxon-Mann-Whitney test. Categorical variables were compared using chi_square d or Fisher's exact test. Kaplan_Meier analysis and log_rank test |
| 11     | Klopfenstein T et al.,2020[25] | Retrospective case-control study | 1) COVID-19 confirmed upon RT-PCR                               | N= 45                                 | n=25, SOC     | n=20, TCZ - 400mg one/two doses IV + SOC | Mortality and/or ICU admission, MV, LOS, BP, Respiratory rate, Saturated O <sub>2</sub> (%), Lymphocytes, CRP, Duration of                                                                | Nil     | Continuous variables were compared by ANOVA test.                                                                                                                                               |

| Sl. No | Author name                      | Study Design  | The population included in the study                                                         | Total No. of patients (Control + TCZ) | Control group                                           | Tocilizumab (TCZ) Treatment                     | Parameters                                                                                                                                                                   | Funding | Adjustments in The Analysis (statistical analysis)                                                                           |
|--------|----------------------------------|---------------|----------------------------------------------------------------------------------------------|---------------------------------------|---------------------------------------------------------|-------------------------------------------------|------------------------------------------------------------------------------------------------------------------------------------------------------------------------------|---------|------------------------------------------------------------------------------------------------------------------------------|
|        |                                  |               |                                                                                              |                                       |                                                         |                                                 | oxygen therapy (days), Time from symptom onset to TCZ initiation (days), [Time Frame: upto 24 days].                                                                         |         | Categorical variables were compared by chi-squared test or Fisher's exact                                                    |
| 12     | Martínez-Sanz J et al.,2020 [23] | Retrospective | 1) Hospitalized, Adults ( $\geq 18$ years) with COVID-19 confirmed upon RT-PCR               | N=1229                                | n=969, SOC (HCQ $\pm$ LPV/r/RTV/r $\pm$ AZT $\pm$ CORTs | n=260, TCZ - 400-600 mg, in one/two doses, IV   | Mortality, Non-ICU length of stay, ICU length of stay, Vitals, Differential count, LDH, ALT, Creatinine Urea, D-Dimer, IL-6, C-reactive protein, [Time Frame: up to 90 days] | Nil     | Continuous variables were compared by ANOVA test. Categorical variables were compared by chi-squared test or Fisher's exact. |
| 13     | Mikulska M et al.,2020 [29]      | Retrospective | 1) Adult patients admitted to the San Martino University Hospital, Genova, Italy, for COVID- | N=196                                 | n=66, SOC (HCQ-400mg bid $\pm$ darunavir/RTV/r 800/100  | n=130, TCZ - 8mg/kg (maximum 800mg), IV One/two | Mortality, IL-6, Ferritin, CRP, D-dimer, PaO <sub>2</sub> /FiO <sub>2</sub> , Non-Invasive                                                                                   | Nil     | Propensity score-based analysis followed                                                                                     |

| Sl. No | Author name                      | Study Design               | The population included in the study            | Total No. of patients (Control + TCZ) | Control group                                                                                                                                                               | Tocilizumab (TCZ) Treatment                                                       | Parameters                                                                                                                 | Funding | Adjustments in The Analysis (statistical analysis)           |
|--------|----------------------------------|----------------------------|-------------------------------------------------|---------------------------------------|-----------------------------------------------------------------------------------------------------------------------------------------------------------------------------|-----------------------------------------------------------------------------------|----------------------------------------------------------------------------------------------------------------------------|---------|--------------------------------------------------------------|
|        |                                  |                            | 19 pneumonia.                                   |                                       | QID+ Antibiotics + LMWH)                                                                                                                                                    | doses or TCZ 162 mg SC + methylprednisolone - 1mg/kg for 5 days IV, then 0.5mg/kg | Ventilation (NIV), [Time Frame: up to 30 days]                                                                             |         | by Cox regression analysis                                   |
| 14     | Moreno-García E et al.,2020 [22] | Retrospective Cohort       | 1) Patients with COVID-19 confirmed upon RT-PCR | N=171                                 | n=94, LPV/r/RTV/r 400/100 mg BID for 7-14 days + HCQ 400 mg/12h on D1, followed by 200 mg/12h for the next 4 days + AZT 500 mg on D1 followed by 250 mg/24h for next 4 days | n=77, TCZ-400mg, one/two/three IV doses + SOC                                     | Mortality, Hospital discharge, Incidence of ICU stay, CRP, D-dimers, Ferritin, Lymphocyte count. Time frame: up to 30 days | Nil     | Propensity score matching followed by multivariate analysis. |
| 15     | Moreno-Pérez O et al.,2020 [42]  | Retrospective cohort study | 1) Patients with COVID-19 pneumonia             | N=236                                 | n=159, SOC (HCQ, LPV/r/RTV/r, AZT)                                                                                                                                          | n=77, TCZ initial 600 mg, with a second or third dose (400 mg), IV                | Mortality, LDH, ALT, AST, LOS, LOS-ICU, PaO2:FiO2, Respiratory rate, BP, Heart rate,                                       | Nil     | Categorical and continuous variables were compared           |

| Sl. No | Author name                  | Study Design                                      | The population included in the study            | Total No. of patients (Control + TCZ) | Control group                                                          | Tocilizumab (TCZ) Treatment             | Parameters                                                                                                                                                                                    | Funding | Adjustments in The Analysis (statistical analysis)                                                                 |
|--------|------------------------------|---------------------------------------------------|-------------------------------------------------|---------------------------------------|------------------------------------------------------------------------|-----------------------------------------|-----------------------------------------------------------------------------------------------------------------------------------------------------------------------------------------------|---------|--------------------------------------------------------------------------------------------------------------------|
|        |                              |                                                   |                                                 |                                       |                                                                        |                                         | eGFR, Leukocytes, Lymphocytes, CRP, Procalcitonin, Ferritin, D-dimer, LDH, IL-6, Troponin T, Brain natriuretic peptide, Creatine phosphokinase, Time frame: up to 80 days                     |         | by Mann-Whitney's U test, chi-squared test, and Fisher's exact tests. Followed by multivariate regression analysis |
| 16     | Pettit NN et al.,2020 [37]   | Single-center, retrospective, observational study | 1) Adult In-patients with COVID-19              | N=148,                                | n=74, SOC                                                              | n=74, TCZ +SOC                          | Infections risk, CRP, ferritin, D-dimer. Time frame: up to 90 days                                                                                                                            | Nil     | Student t-test and/or Mann-Whitney's U test.                                                                       |
| 17     | Quartuccio L et al.,2020[38] | Retrospective                                     | 1) Patients with COVID-19 confirmed upon RT-PCR | N=111                                 | n=69, SOC (Antivirals/Glucocorticoids /Antimalarials/Antibiotics/LMWH) | n=42, TCZ-8mg/kg, IV, single Dose + SOC | WBC count, differential count, CD4 <sup>+</sup> T cells, CD8 <sup>+</sup> T cells, CD19 <sup>+</sup> B cells, CD56 <sup>+</sup> NK cells, Platelet count, CRP, D-dimer, LDH, IL-6, Creatinine | Nil     | Categorical variables were compared by Mann-Whitney test and continuous variables by t-test.                       |



| Sl. No | Author name                  | Study Design  | The population included in the study                                           | Total No. of patients (Control + TCZ) | Control group | Tocilizumab (TCZ) Treatment | Parameters                                                                                                                                             | Funding | Adjustments in The Analysis (statistical analysis)                                                                                               |
|--------|------------------------------|---------------|--------------------------------------------------------------------------------|---------------------------------------|---------------|-----------------------------|--------------------------------------------------------------------------------------------------------------------------------------------------------|---------|--------------------------------------------------------------------------------------------------------------------------------------------------|
|        |                              |               |                                                                                |                                       |               |                             | Kinase<br>[Time Frame:<br>Up to 30 Days]                                                                                                               |         | Proportions were compared by Chi-squared test or Fisher exact test. Bivariate correlation was performed by two-tailed Pearson or Spearman tests. |
| 18     | Ramaswamy M et al.,2020 [43] | Retrospective | 1) Hospitalized, Adults ( $\geq 18$ years) with COVID-19 confirmed upon RT-PCR | N=86                                  | n=65, SOC     | n=21, TCZ - 8mg/kg IV,      | AST, ALT, ASP, D-dimer, IL-6, CRP, Hematology, eGFR, INR, Ferritin, Procalcitonin, Serum Creatinine, BUN, Total bilirubin<br>Time frame: up to 35 days | Nil     | t-tests for continuous variables and Chi-squared test for binary and categorical variables. treatment effects models                             |

| Sl. No | Author name                     | Study Design                             | The population included in the study                                                                                                     | Total No. of patients (Control + TCZ) | Control group                                                            | Tocilizumab (TCZ) Treatment                | Parameters                                                                                                                                  | Funding | Adjustments in The Analysis (statistical analysis)                                                                    |
|--------|---------------------------------|------------------------------------------|------------------------------------------------------------------------------------------------------------------------------------------|---------------------------------------|--------------------------------------------------------------------------|--------------------------------------------|---------------------------------------------------------------------------------------------------------------------------------------------|---------|-----------------------------------------------------------------------------------------------------------------------|
| 19     | Rojas-Martel G et al.,2020 [34] | Retrospective                            | 1) Adult patients hospitalized with severe to critical SARS-CoV-2 infection (COVID-19)                                                   | N=193                                 | n=97, SOC (HQ+RMV/r + AZT+CORTs + Vit C+ zinc)                           | n=96, TCZ + SOC                            | Mortality, LOS, Vitals, CRP, D-dimers, Ferritin, troponin, differential count, Oxygen requirement, Procalcitonin. Time frame: up to 30 days | Nil     | Student's t-test for continuous variables and the Chi-squared test or Fischer's exact test for categorical variables. |
| 20     | Rossi B et al.,2020[19]         | Retrospective case-control study, cohort | 1) COVID-19 positive testing with RT-PCR) or chest CT-scan with typical lesions.<br>2) Severe COVID-19 pneumonia                         | N=168                                 | n=84, Antibiotics/H CQ/ Lopinavir/RT V/r/BCB/Immunosuppressants or CORTs | n=84, TCZ- 400mg single IV dose            | Mortality, survival with MV, CRP, Lymphocytes. Time frame: up to 30 days                                                                    | Nil     | Propensity-score matching followed by Cox multivariable survival analysis                                             |
| 21     | Roumier M et al.,2020 [24]      | Retrospective                            | 1) COVID-19 positive patients<br>2) Age <80 years<br>3) severe rapidly deteriorating pneumonia,<br>4) high C-reactive protein levels and | N=59                                  |                                                                          | n=30, TCZ - 8mg/kg IV, One/Two doses + SOC | Mortality, MV, Incidence Of ICU, CRP, Ferritin, D-dimer, CT of Lungs, Time frame: up to 10 days                                             | Nil     | Inverse probability of treatment weighted methodology                                                                 |

| Sl. No | Author name                 | Study Design                     | The population included in the study                                                                                                          | Total No. of patients (Control + TCZ) | Control group                            | Tocilizumab (TCZ) Treatment      | Parameters                                                                          | Funding                                     | Adjustments in The Analysis (statistical analysis)                            |
|--------|-----------------------------|----------------------------------|-----------------------------------------------------------------------------------------------------------------------------------------------|---------------------------------------|------------------------------------------|----------------------------------|-------------------------------------------------------------------------------------|---------------------------------------------|-------------------------------------------------------------------------------|
|        |                             |                                  | 5) with $\geq 5$ days of prior disease duration.                                                                                              |                                       |                                          |                                  |                                                                                     |                                             |                                                                               |
| 22     | Somers EC et al., 2020 [35] | Retrospective Cohort             | 1) COVID-19 positive testing with RT-PCR)<br>2) Require invasive mechanical ventilation.                                                      | N=154                                 | n=76, SOC (HCQ/RMV/r + Supportive Drugs) | n=78, TCZ-400mg, one/two IV dose | Mortality, Superinfection, discharged from hospital, LOS. Time frame: up to 30 days | Nil                                         | Kaplan-Meier survival curves, Univariate and multivariable analysis.          |
| 23     | Wadud N et al.,2020 [40]    | Retrospective case-control study | 1) COVID-19 positive testing with RT-PCR)<br>2) At least 18 years of age<br>3) Admitted to the hospital between Mar 15, 2020, to Apr 20, 2020 | N=94                                  | n=50, SOC                                | n=44, TCZ + SOC                  | Mortality, CRP, IL-6, TGL, ferritin, fibrinogen, AST, D-dimer, fibrinogen, EKG,     | Nil                                         | Z score was calculated and the mean value is compared between the two groups. |
| 24     | Zheng KL et al.,2020 [20]   | Retrospective                    | 1) COVID-19 positive testing with RT-PCR) with evidence of pneumonia                                                                          | N=181                                 | n=92, SOC                                | n=89, TCZ-4-8mg/kg-IV + SOC      | Mortality, discharge, LOS, hematology, LFTs, electrolytes, CRP, IL-6, D-dimers,     | This work was supported by Shanghai Natural | For continuous variables, either unpaired t-tests or Mann-                    |

| Sl. No | Author name | Study Design | The population included in the study | Total No. of patients (Control + TCZ) | Control group | Tocilizumab (TCZ) Treatment | Parameters                                                                                                       | Funding                                 | Adjustments in The Analysis (statistical analysis)                                                                                                                                                               |
|--------|-------------|--------------|--------------------------------------|---------------------------------------|---------------|-----------------------------|------------------------------------------------------------------------------------------------------------------|-----------------------------------------|------------------------------------------------------------------------------------------------------------------------------------------------------------------------------------------------------------------|
|        |             |              |                                      |                                       |               |                             | Fibrinogen, Ferritin, Creatinine Kinase, Troponin T, Lactate Dehydrogenase, vitals.<br>Time frame: up to 30 days | Science Foundation Grant No.19ZR 145580 | Whitney's U test was used. For multiple groups comparison, one-way ANOVA or Kruskal-Wallis test was used. Categorical variables were analyzed using the chi-squared test or Fisher's exact test, as appropriate. |

**Note** : TCZ, tocilizumab; SOC, standard of care; Lopinavir, LPV/r; Ritonavir, RTV/r; Baricitinib, BCB; Corticosteroids, CORT; Hydroxychloroquine, HCQ; Azithromycin, AZT; Remdesivir, RMV/r; Darunavir, DNV/r; IV, intravenous; SC, subcutaneous; MV, mechanical ventilation; IMV, invasive mechanical ventilation; ICU, Intensive care unit; CRP, C-reactive protein; IL-6, interleukin-6; LFT, liver function tests, LOS, length of hospital stay; LOS-ICU, length of stay in the ICU.

## Figure Legends

Figure 1. PRISMA Flow chart

Figure 2. Risk of bias summary and Risk of bias Graph

Figure 3. Effect of Tocilizumab on COVID-19 mortality

Figure 4. Effect of Tocilizumab on COVID-19 related ICU ward admission rate

Figure 5. Effect of Tocilizumab on the need of Mechanical ventilation in COVID-19 patients

Figure 6. Effect of Tocilizumab on Length of Hospital Stay (LOS) in COVID-19 patients

Figure 7. Effect of Tocilizumab on Length of Hospital Stay in ICU (LOS-ICU) in COVID-19 patients

Figure 8. The incidences of Tocilizumab-induced super-infections in COVID-19 patients

Figure 9. The incidents of Tocilizumab-induced pulmonary thrombosis in COVID-19 patients

**Figure 1. PRISMA Flow diagram**

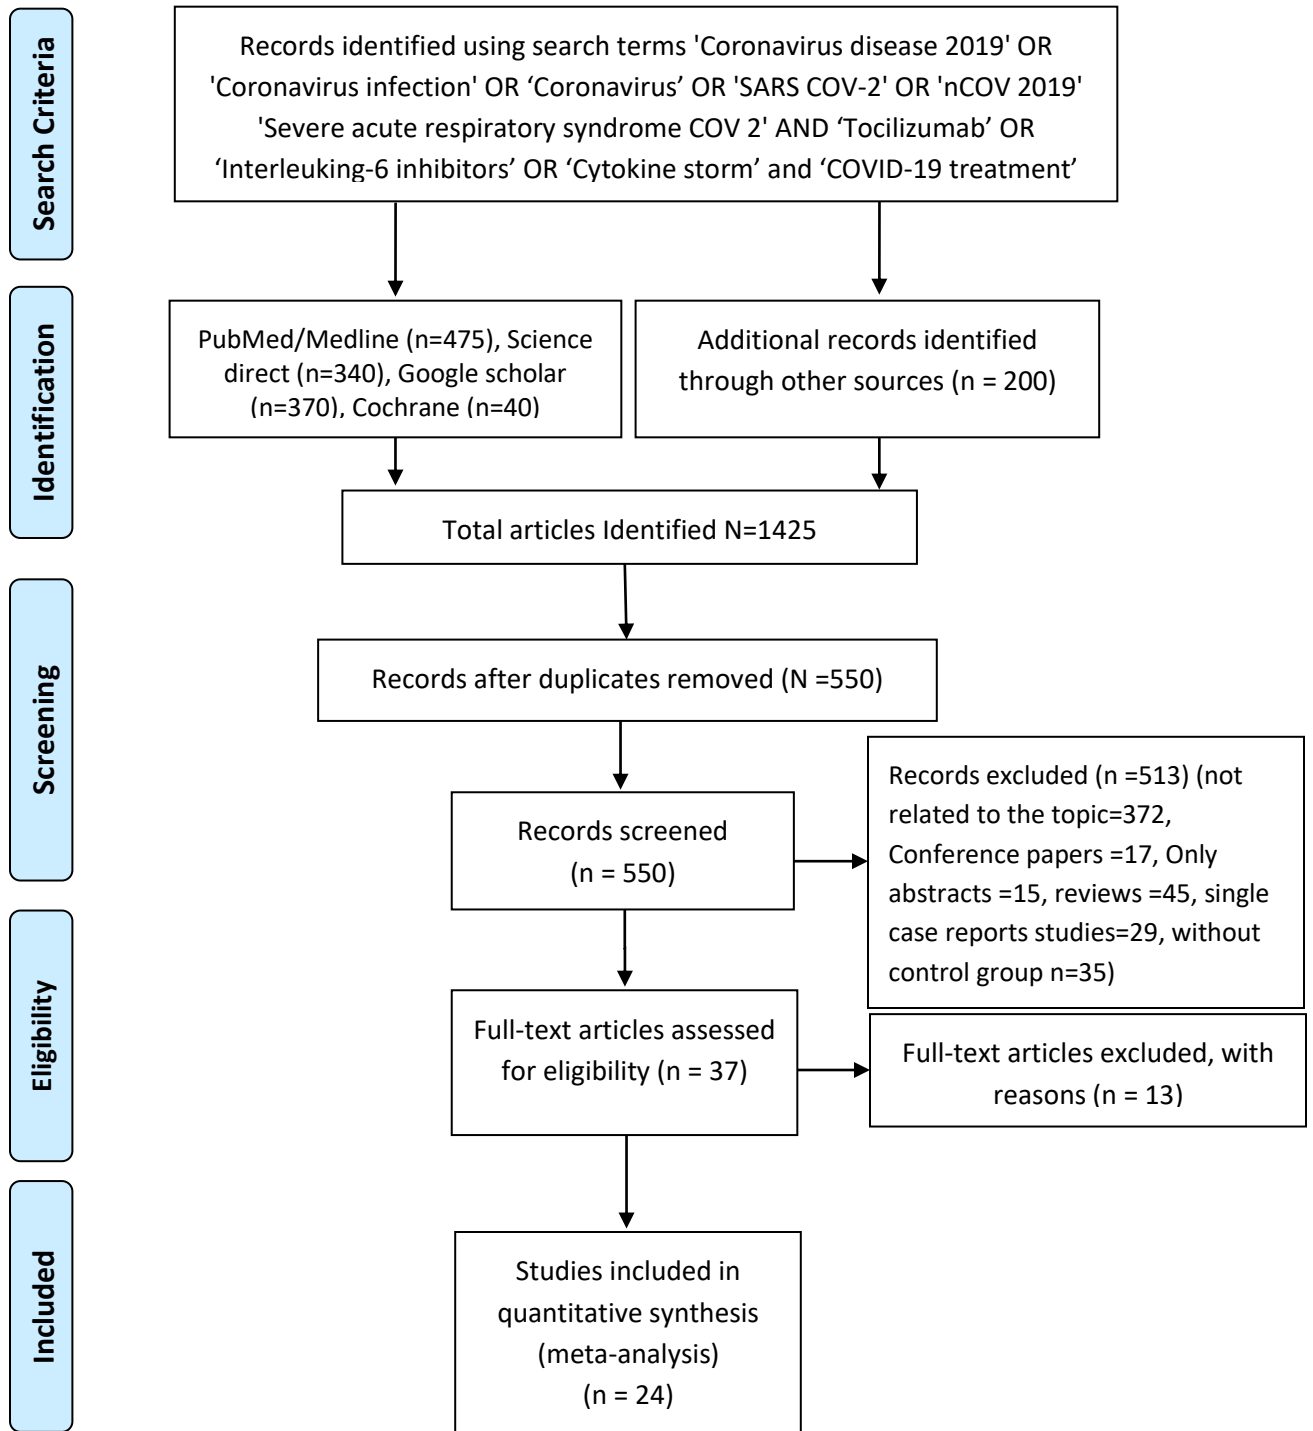

**Figure 2. Risk of bias summary and Risk of bias Graph**

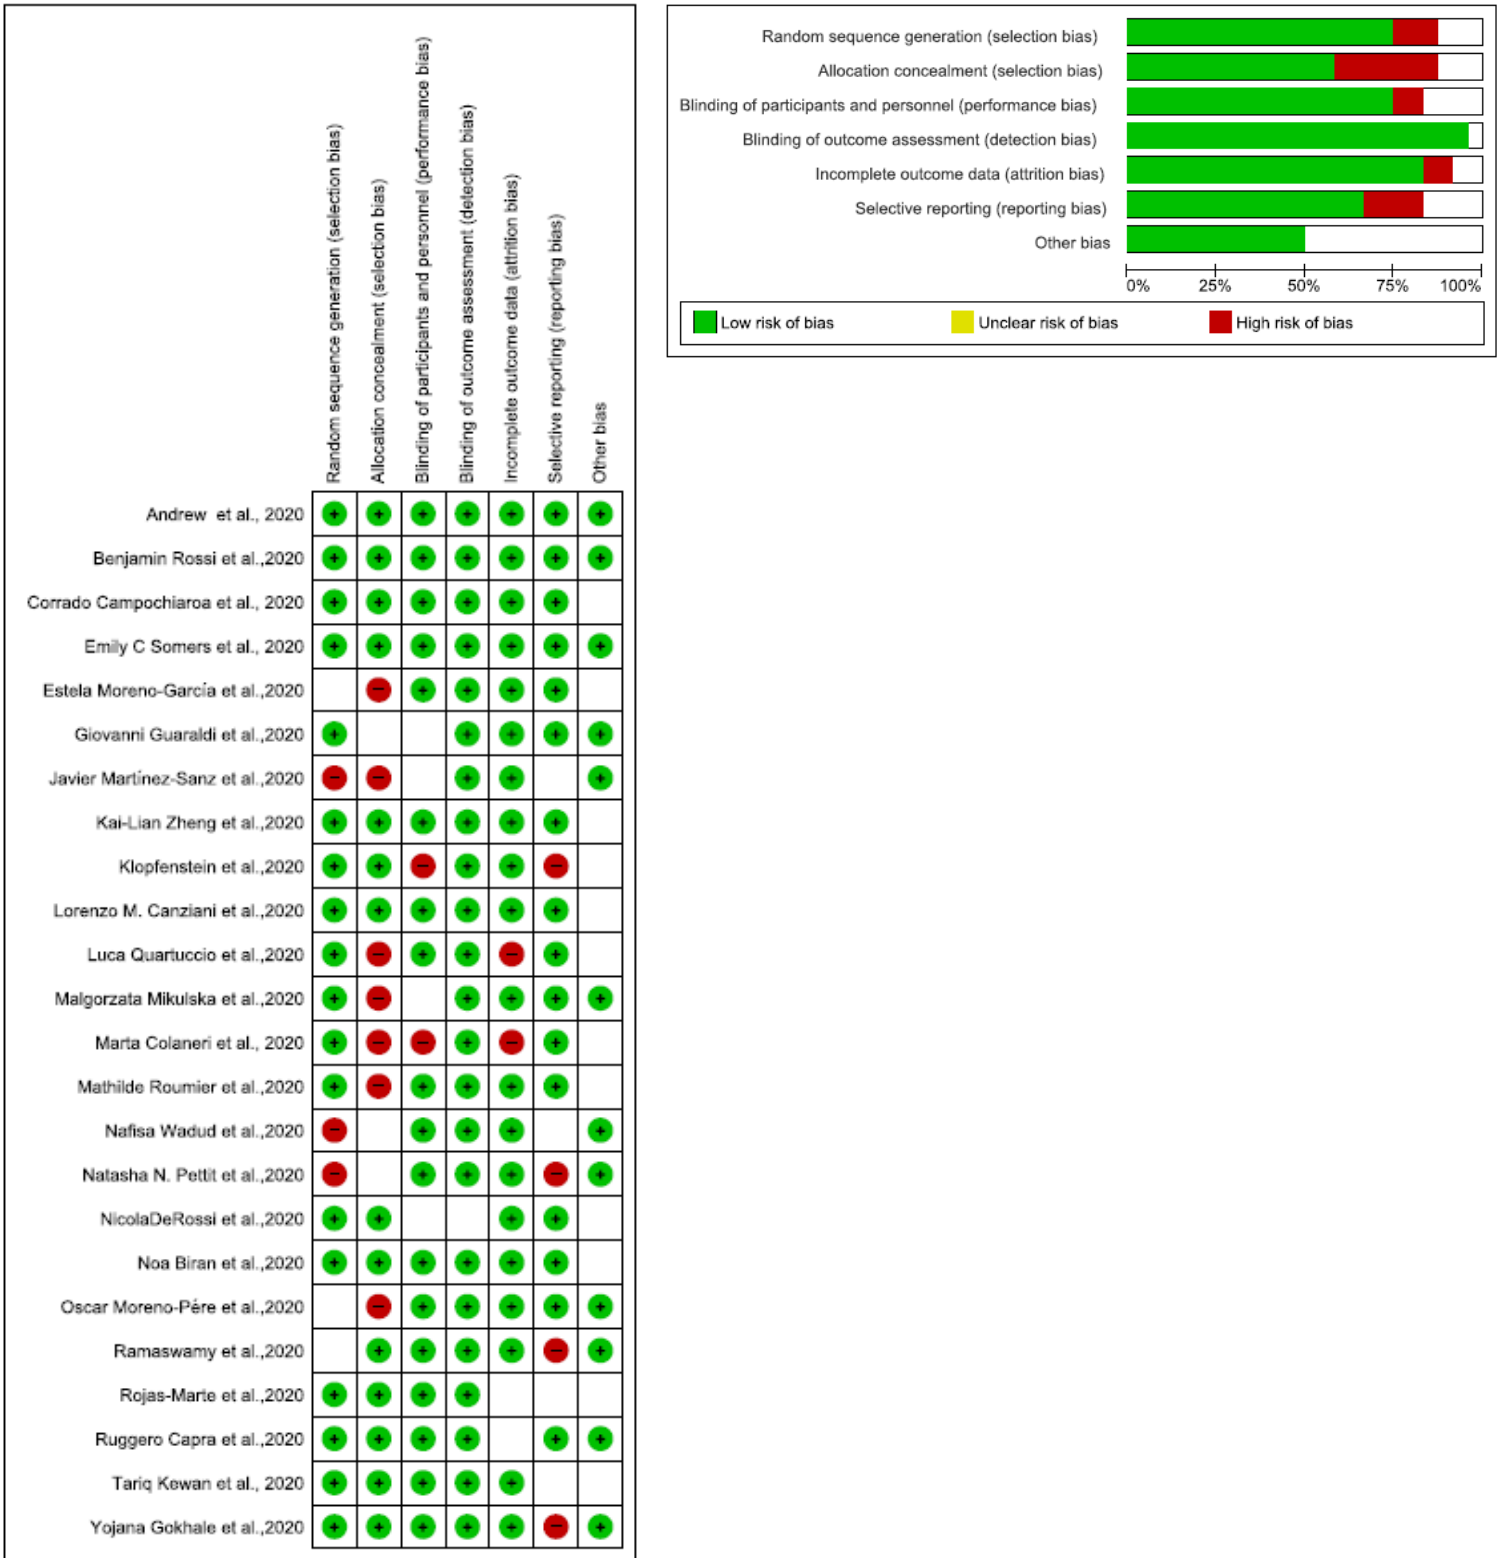

**Figure 3. Effect of Tocilizumab on COVID-19 mortality**

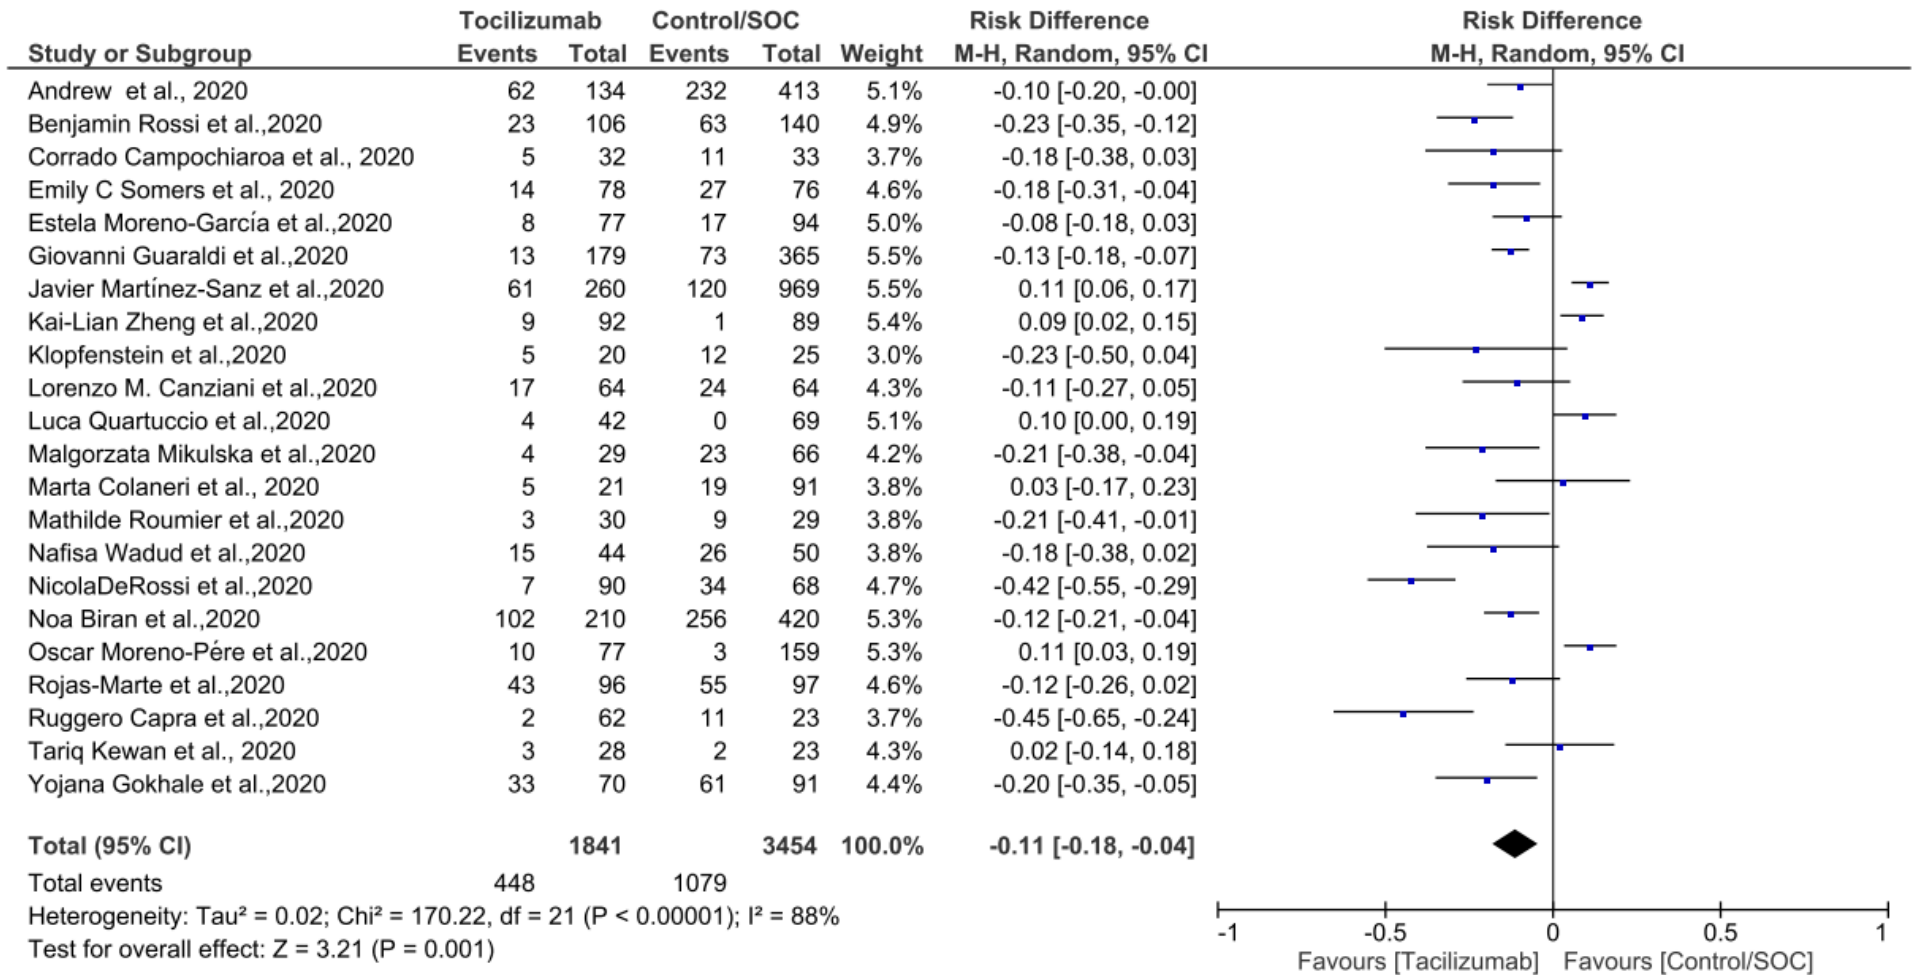



**Figure 4. Effect of Tocilizumab on COVID-19 related ICU ward admission rate**

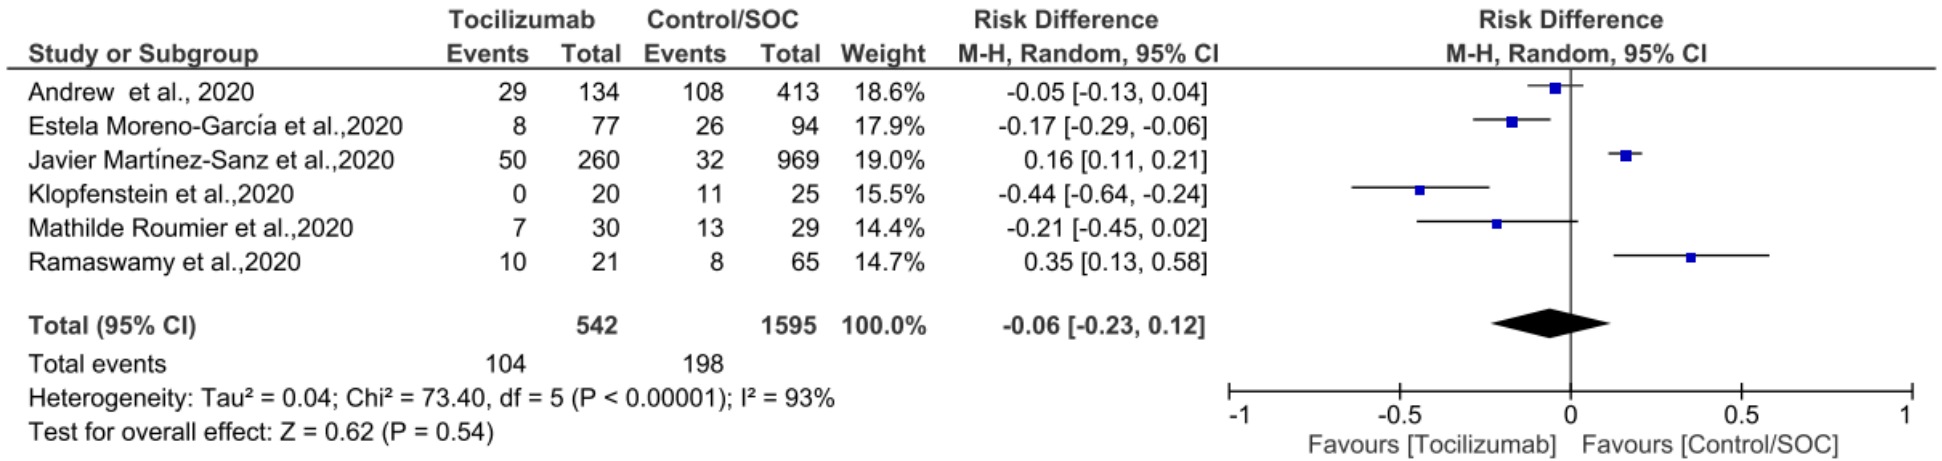

**Figure 5. Effect of Tocilizumab on need of Mechanical ventilation in COVID-19 patients**

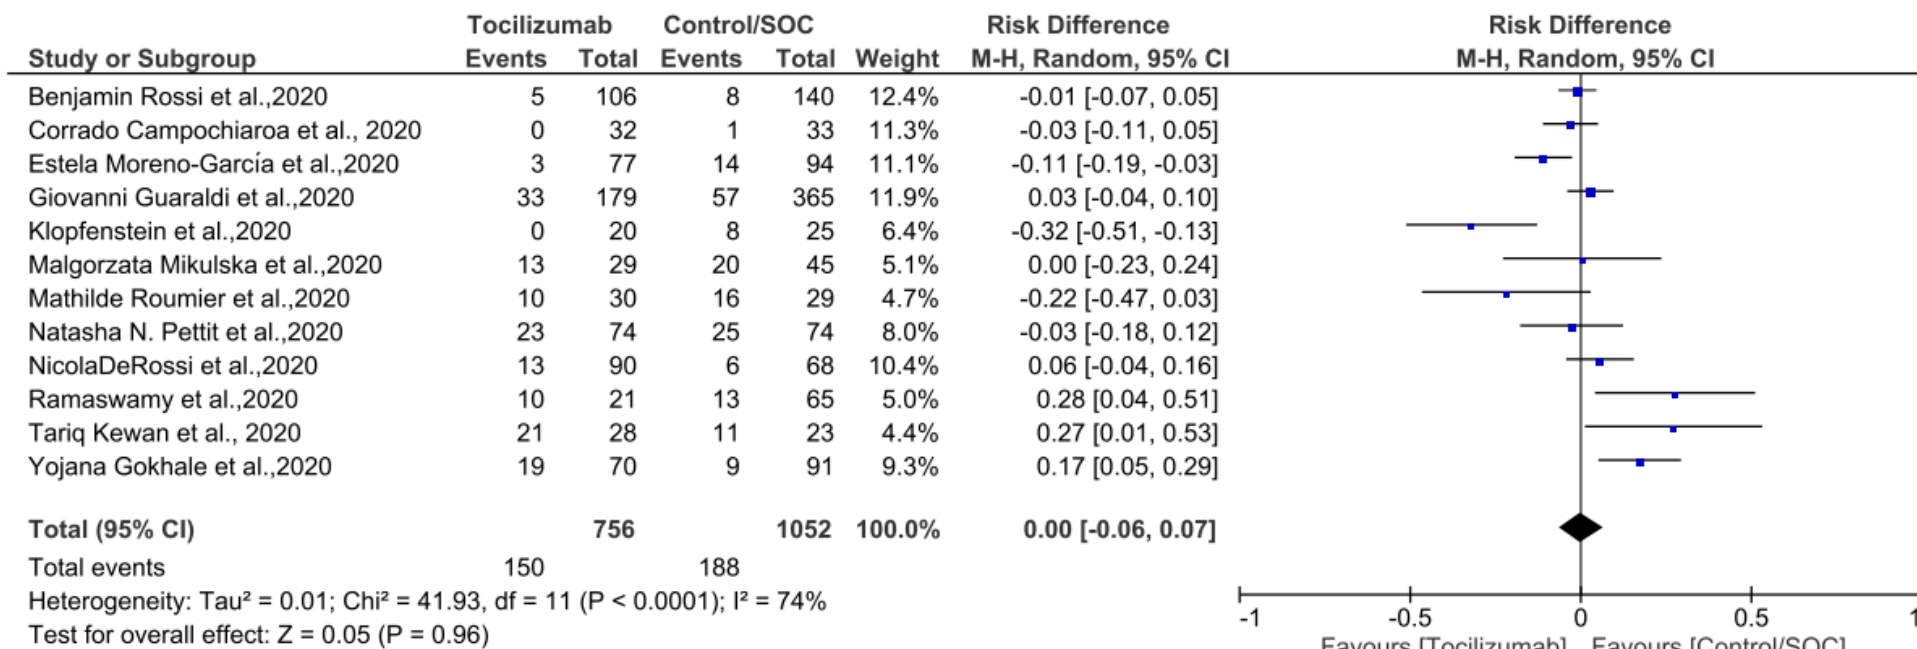

**Figure 6. Effect of Tocilizumab on Length of Hospital Stay (LOS) in COVID-19 patients**

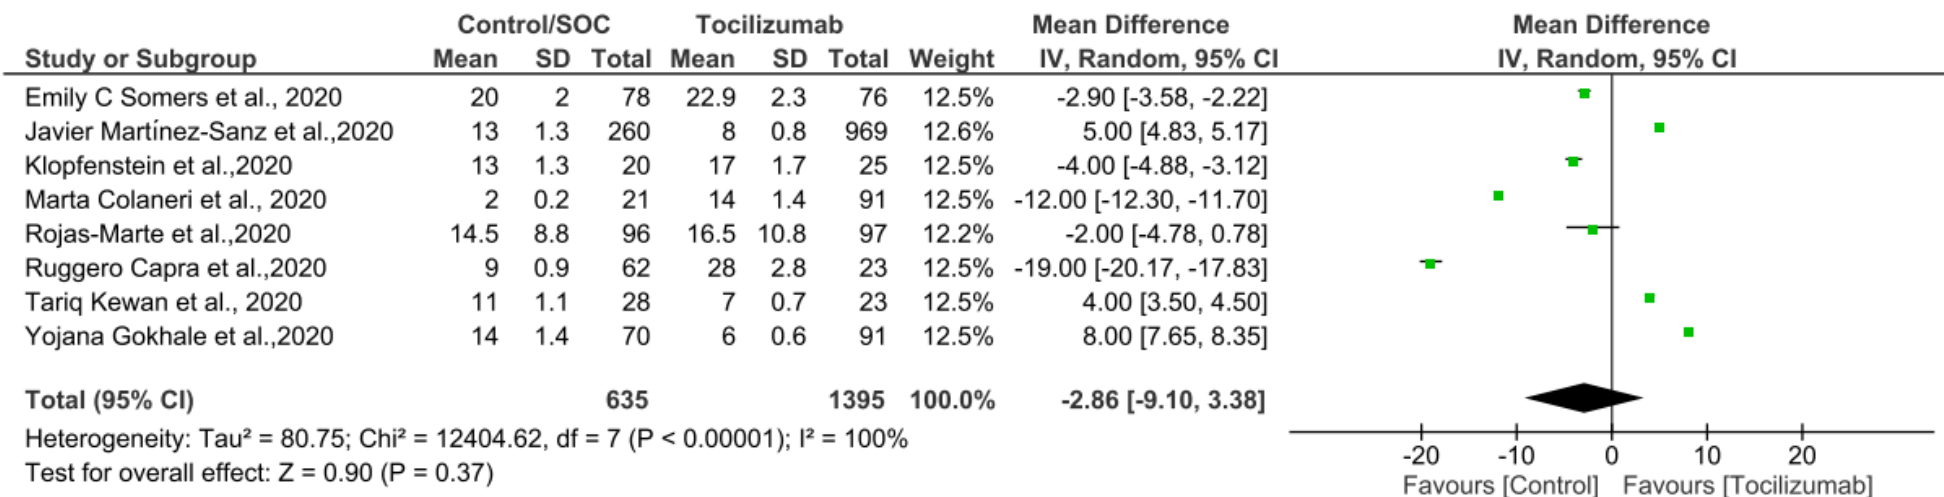

**Figure 7. Effect of Tocilizumab on Length of Hospital Stay in ICU (LOS-ICU) in COVID-19 patients**

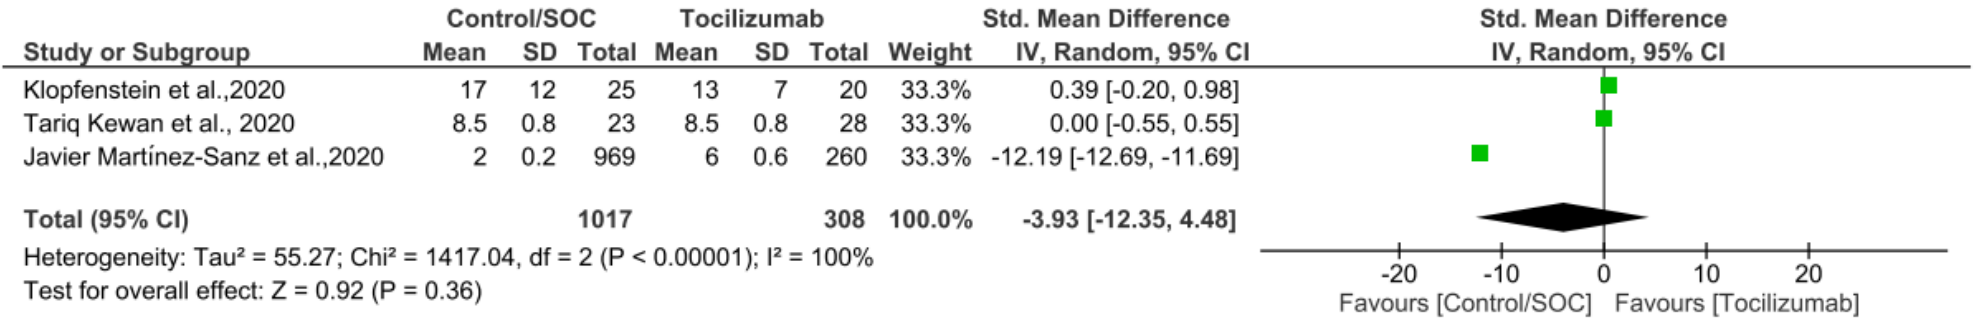

**Figure 8. The incidences of Tocilizumab-induced super-infections in COVID-19 patients**

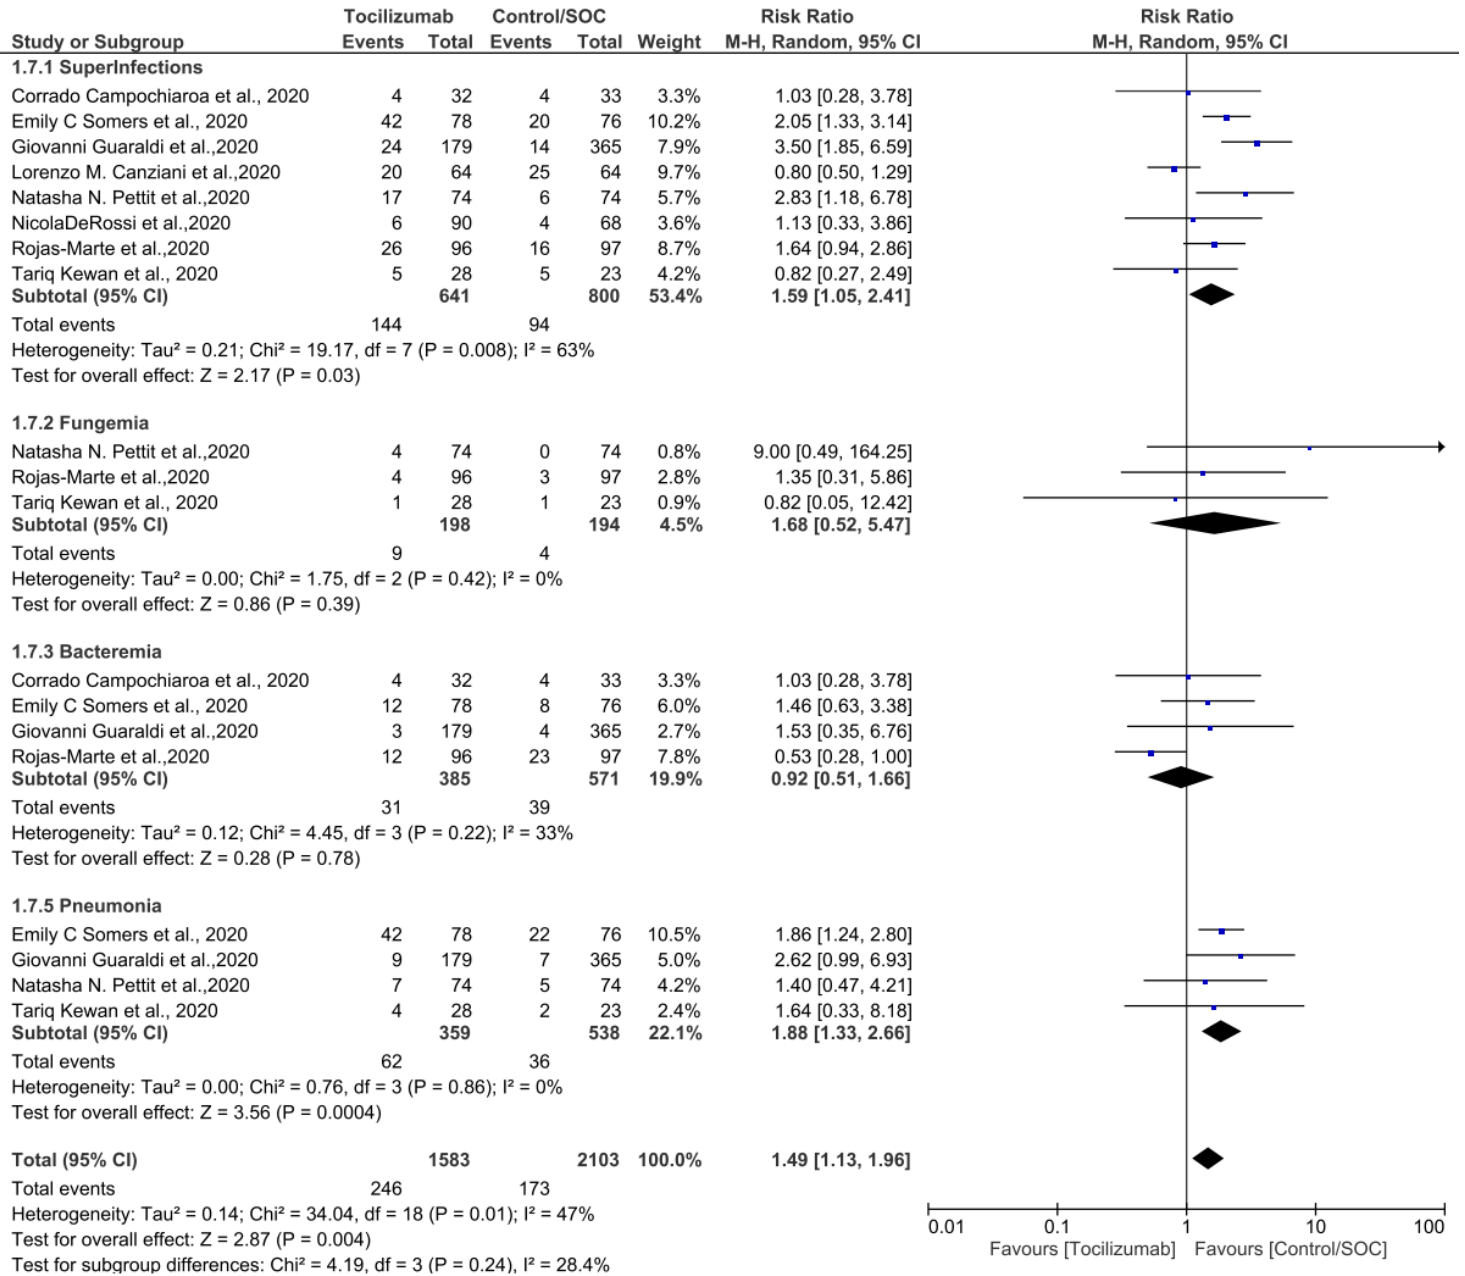

**Figure 9. The incidents of Tocilizumab-induced pulmonary thrombosis in COVID-19 patients**

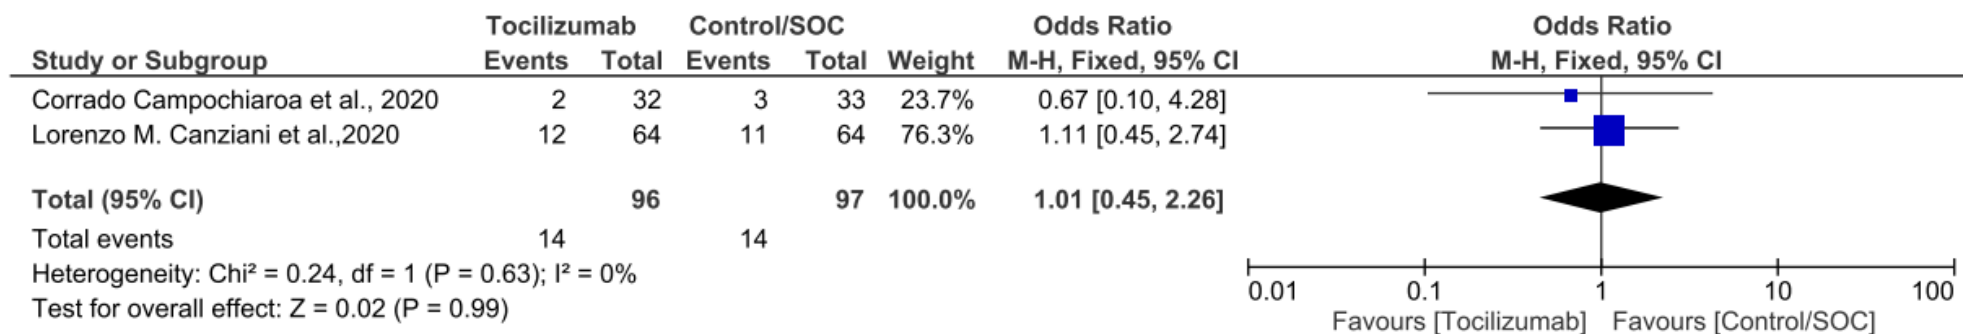

### Annexure 1: Search strategy using PUBMED

| SI No. | Search Terms                                                                                                                                    | Results |
|--------|-------------------------------------------------------------------------------------------------------------------------------------------------|---------|
| 1      | 'Coronavirus disease 2019' OR 'Coronavirus infection' OR 'Coronavirus' OR 'SARS COV-2' OR 'nCOV 2019' 'Severe acute respiratory syndrome COV 2' | 112565  |
| 2      | 'Tocilizumab' OR 'Interleukin-6 inhibitors' OR 'Cytokine storm' OR 'COVID-19 treatment'                                                         | 13178   |
| 3      | 1 AND 2                                                                                                                                         | 613     |
| 4      | 3 NOT ('Meta-analysis' OR 'Practice guideline' OR 'Systematic review' OR)                                                                       | 550     |
| 5      | 4 NOT ('Newsletters' OR 'Commentaries' OR 'Opinions' OR 'Editorial' OR 'letter to the editor' OR 'Short survey')                                | 475     |

## Annexure 2. List of excluded papers based on full-text evaluation

| Sl. No. | First author-name         | Title                                                                                                                                                                                                                                                                                              | Reason for exclusion                                                                                                                                 |
|---------|---------------------------|----------------------------------------------------------------------------------------------------------------------------------------------------------------------------------------------------------------------------------------------------------------------------------------------------|------------------------------------------------------------------------------------------------------------------------------------------------------|
| 1       | Betul Borku et al.,       | Tocilizumab challenge: A series of cytokine storm therapy experiences in hospitalized COVID-19 pneumonia patients                                                                                                                                                                                  | 1.No control group                                                                                                                                   |
| 2       | Federico Alberici et al., | Management of Patients on Dialysis and With Kidney Transplantation During the SARS-CoV-2 (COVID-19) Pandemic in Brescia, Italy                                                                                                                                                                     | 1.No numerical data reported                                                                                                                         |
| 3       | Marcus R. Pereira et al., | COVID-19 in solid organ transplant recipients: Initial report from the US epicenter                                                                                                                                                                                                                | 1. Patients have a history of solid organ transplant<br>2.No control group                                                                           |
| 4       | Marfella et al.,          | Negative impact of hyperglycemia on tocilizumab therapy in Covid-19 patients                                                                                                                                                                                                                       | 1. Evaluations related to glycaemic control in the diabetic population<br>2. No control group<br>3. No numerical data                                |
| 5       | Maria Mazzitelli et al.,  | Use of subcutaneous tocilizumab in patients with COVID-19 pneumonia                                                                                                                                                                                                                                | 1.No numerical data<br>2.No control group                                                                                                            |
| 6       | Nahéma Issa et al.,       | Feasibility of Tocilizumab in ICU patients with COVID-19                                                                                                                                                                                                                                           | 1.No control group<br>2. Only biochemical parameters are considered, which are out of the scope of the present review.                               |
| 7       | Nan Yu et al.,            | Clinical features and obstetric and neonatal outcomes of pregnant patients with COVID-19 in Wuhan, China: a retrospective, single-center, descriptive study, March 24, 2020: 30176-6.<br><a href="http://doi.org/10.1016/S1473-3099(20)30176-6">http://doi.org/10.1016/S1473-3099(20)30176-6</a> . | 1.Case series without a parallel control                                                                                                             |
| 8       | Pan Luo et al.,           | Tocilizumab treatment in COVID-19: A single-center experience                                                                                                                                                                                                                                      | 1. Case series without a control group.<br>2. Only CRP and IL-6 were considered as parameters, which are not out of the scope of the present review. |
| 9       | Patel K et al.,           | Use of the IL-6R antagonist tocilizumab in hospitalized COVID-19 patients.                                                                                                                                                                                                                         | 1. No control group                                                                                                                                  |



|    |                     |                                                                                    |                                                                                                |
|----|---------------------|------------------------------------------------------------------------------------|------------------------------------------------------------------------------------------------|
| 10 | Şiran Keske et al., | Appropriate use of tocilizumab in COVID-19 infection                               | 1. No control group                                                                            |
| 11 | Timothy et al.,     | Tocilizumab for severe COVID-19 pneumonia: Case series of 5 Australian patients    | 1. Case series without parallel control.                                                       |
| 12 | Tomasiewicz et al., | Tocilizumab for patients with severe COVID-19: a retrospective, multi-center study | 1. No control group<br>2. The parameters evaluated are out of the scope of the present review. |
| 13 | Xu X et al.,        | Effective treatment of severe COVID-19 patients with tocilizumab.                  | 1. No control group<br>2. The parameters evaluated are out of the scope of the present review  |

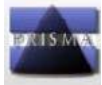

# PRISMA 2009 Checklist

| Section/topic                      | #  | Checklist item                                                                                                                                                                                                                                                                                              | Reported on page # |
|------------------------------------|----|-------------------------------------------------------------------------------------------------------------------------------------------------------------------------------------------------------------------------------------------------------------------------------------------------------------|--------------------|
| <b>TITLE</b>                       |    |                                                                                                                                                                                                                                                                                                             |                    |
| Title                              | 1  | Identify the report as a systematic review, meta-analysis, or both.                                                                                                                                                                                                                                         | 1                  |
| <b>ABSTRACT</b>                    |    |                                                                                                                                                                                                                                                                                                             |                    |
| Structured summary                 | 2  | Provide a structured summary including, as applicable: background; objectives; data sources; study eligibility criteria, participants, and interventions; study appraisal and synthesis methods; results; limitations; conclusions and implications of key findings; systematic review registration number. | 2                  |
| <b>INTRODUCTION</b>                |    |                                                                                                                                                                                                                                                                                                             |                    |
| Rationale                          | 3  | Describe the rationale for the review in the context of what is already known.                                                                                                                                                                                                                              | 4                  |
| Objectives                         | 4  | Provide an explicit statement of questions being addressed with reference to participants, interventions, comparisons, outcomes, and study design (PICOS).                                                                                                                                                  | 4                  |
| <b>METHODS</b>                     |    |                                                                                                                                                                                                                                                                                                             |                    |
| Protocol and registration          | 5  | Indicate if a review protocol exists, if and where it can be accessed (e.g., Web address), and, if available, provide registration information including registration number.                                                                                                                               | NA                 |
| Eligibility criteria               | 6  | Specify study characteristics (e.g., PICOS, length of follow-up) and report characteristics (e.g., years considered, language, publication status) used as criteria for eligibility, giving rationale.                                                                                                      | 5                  |
| Information sources                | 7  | Describe all information sources (e.g., databases with dates of coverage, contact with study authors to identify additional studies) in the search and date last searched.                                                                                                                                  | 5                  |
| Search                             | 8  | Present full electronic search strategy for at least one database, including any limits used, such that it could be repeated.                                                                                                                                                                               | 5<br>Annexure 1    |
| Study selection                    | 9  | State the process for selecting studies (i.e., screening, eligibility, included in systematic review, and, if applicable, included in the meta-analysis).                                                                                                                                                   | 5,6                |
| Data collection process            | 10 | Describe method of data extraction from reports (e.g., piloted forms, independently, in duplicate) and any processes for obtaining and confirming data from investigators.                                                                                                                                  | 6                  |
| Data items                         | 11 | List and define all variables for which data were sought (e.g., PICOS, funding sources) and any assumptions and simplifications made.                                                                                                                                                                       | 6                  |
| Risk of bias in individual studies | 12 | Describe methods used for assessing risk of bias of individual studies (including specification of whether this was done at the study or outcome level), and how this information is to be used in any data synthesis.                                                                                      | 6                  |
| Summary measures                   | 13 | State the principal summary measures (e.g., risk ratio, difference in means).                                                                                                                                                                                                                               | 6, 7               |
| Synthesis of results               | 14 | Describe the methods of handling data and combining results of studies, if done, including measures of consistency (e.g., $I^2$ ) for each meta-analysis.                                                                                                                                                   | 6, 7               |



# PRISMA 2009 Checklist

| Section/topic                 | #  | Checklist item                                                                                                                                                                                           | Reported on page # |
|-------------------------------|----|----------------------------------------------------------------------------------------------------------------------------------------------------------------------------------------------------------|--------------------|
| Risk of bias across studies   | 15 | Specify any assessment of risk of bias that may affect the cumulative evidence (e.g., publication bias, selective reporting within studies).                                                             | 6                  |
| Additional analyses           | 16 | Describe methods of additional analyses (e.g., sensitivity or subgroup analyses, meta-regression), if done, indicating which were pre-specified.                                                         | 6                  |
| <b>RESULTS</b>                |    |                                                                                                                                                                                                          |                    |
| Study selection               | 17 | Give numbers of studies screened, assessed for eligibility, and included in the review, with reasons for exclusions at each stage, ideally with a flow diagram.                                          | 7, Figure 1        |
| Study characteristics         | 18 | For each study, present characteristics for which data were extracted (e.g., study size, PICOS, follow-up period) and provide the citations.                                                             | Table 1            |
| Risk of bias within studies   | 19 | Present data on risk of bias of each study and, if available, any outcome level assessment (see item 12).                                                                                                | Figure 2           |
| Results of individual studies | 20 | For all outcomes considered (benefits or harms), present, for each study: (a) simple summary data for each intervention group (b) effect estimates and confidence intervals, ideally with a forest plot. | Figure 3-9         |
| Synthesis of results          | 21 | Present results of each meta-analysis done, including confidence intervals and measures of consistency.                                                                                                  | 10 - 11            |
| Risk of bias across studies   | 22 | Present results of any assessment of risk of bias across studies (see Item 15).                                                                                                                          | 8                  |
| Additional analysis           | 23 | Give results of additional analyses, if done (e.g., sensitivity or subgroup analyses, meta-regression [see Item 16]).                                                                                    | N/A                |
| <b>DISCUSSION</b>             |    |                                                                                                                                                                                                          |                    |
| Summary of evidence           | 24 | Summarize the main findings including the strength of evidence for each main outcome; consider their relevance to key groups (e.g., healthcare providers, users, and policy makers).                     | 11-14              |
| Limitations                   | 25 | Discuss limitations at study and outcome level (e.g., risk of bias), and at review-level (e.g., incomplete retrieval of identified research, reporting bias).                                            | 13-14              |
| Conclusions                   | 26 | Provide a general interpretation of the results in the context of other evidence, and implications for future research.                                                                                  | 14-15              |
| <b>FUNDING</b>                |    |                                                                                                                                                                                                          |                    |
| Funding                       | 27 | Describe sources of funding for the systematic review and other support (e.g., supply of data); role of funders for the systematic review.                                                               | N/A                |

From: Moher D, Liberati A, Tetzlaff J, Altman DG, The PRISMA Group (2009). Preferred Reporting Items for Systematic Reviews and Meta-Analyses: The PRISMA Statement. PLoS Med 6(7): e1000097. doi:10.1371/journal.pmed1000097

For more information, visit: [www.prisma-statement.org](http://www.prisma-statement.org).
